# Supplementary material for: Variants in genes encoding small GTPases and association with epithelial ovarian cancer susceptibility
Source: PLoS One. 2018 Jul 6;13(7):e0197561. doi: 10.1371/journal.pone.0197561 (PMC6034790; doi:10.1371/journal.pone.0197561)
Supplement: S1 Table — More details are available upon request. (XLS) [file pone.0197561.s004.xls]

## Sheet: ST1
snp	minp_4_analyses	chr	position	symbol	min/maj	maf	OR (95% CI)	p-value	FDR_q	OR (95% CI) serous	p-value serous	FDR_q serous
rs3935435	0.0314	1	6494762	PLEKHG5	A/G	0.2281	1.02 (0.98-1.05)	0.4055	0.514029	1.03 (0.98-1.07)	0.222	0.606097
rs4243829	0.01262	1	6500352	PLEKHG5	A/G	0.3537	0.99 (0.96-1.02)	0.6304	0.6304	1 (0.97-1.04)	0.8755	0.8755
rs221045	0.03166	1	16402636	ARHGEF19	G/A	0.2604	0.98 (0.95-1.02)	0.3142	0.505604	0.98 (0.94-1.02)	0.3527	0.657313
rs12725975	0.02068	1	17764983	ARHGEF10L	G/A	0.4303	0.99 (0.96-1.02)	0.3374	0.510404	1 (0.96-1.03)	0.7929	0.7929
rs2256787	0.0007415	1	17765403	ARHGEF10L	A/C	0.06774	1.1 (1.03-1.17)	0.00334	0.139081	1.03 (0.96-1.11)	0.435	0.67981
rs10788679	0.03734	1	17789549	ARHGEF10L	A/G	0.4248	1.05 (1.02-1.08)	0.001471	0.103104	1.07 (1.03-1.11)	0.0002584	0.0676902
rs6660824	0.02355	1	17918530	ARHGEF10L	A/G	0.04793	1.02 (0.95-1.09)	0.6159	0.6159	0.98 (0.9-1.07)	0.6835	0.70729
rs7515386	0.04619	1	21794323	RAP1GAP	A/G	0.1542	0.99 (0.95-1.03)	0.5766	0.5766	0.98 (0.93-1.03)	0.3538	0.657313
rs829374	0.03907	1	21861209	RAP1GAP	G/A	0.2763	0.99 (0.96-1.02)	0.5342	0.5342	0.98 (0.94-1.02)	0.3086	0.621703
rs12742802	0.007138	1	94402231	ARHGAP29	A/C	0.2648	0.98 (0.95-1.02)	0.2802	0.505604	0.98 (0.94-1.02)	0.3791	0.657674
rs11577575	0.01956	1	94419102	ARHGAP29	A/G	0.235	0.98 (0.95-1.02)	0.3181	0.505604	0.97 (0.93-1.02)	0.211	0.606097
rs2274788	0.03737	1	94447314	ARHGAP29	G/A	0.2563	0.99 (0.96-1.03)	0.5681	0.5681	0.97 (0.93-1.01)	0.1875	0.606097
rs4915063	0.008657	1	107992104	VAV3	G/A	0.4089	0.99 (0.96-1.02)	0.4726	0.526123	1 (0.96-1.04)	0.9397	0.9397
rs2494047	0.006675	1	108014383	VAV3	A/G	0.3939	0.99 (0.96-1.02)	0.5354	0.5354	1 (0.97-1.04)	0.8343	0.8343
rs4462178	0.02137	1	108116660	VAV3	A/G	0.3589	0.99 (0.96-1.02)	0.5353	0.5353	1 (0.96-1.04)	0.9453	0.9453
rs10494076	0.02678	1	108139850	VAV3	G/A	0.3672	0.99 (0.96-1.02)	0.6411	0.6411	1 (0.96-1.04)	0.9325	0.9325
rs12126655	0.02938	1	108158343	VAV3	G/A	0.3297	0.99 (0.96-1.02)	0.492	0.526123	0.99 (0.96-1.03)	0.7523	0.7523
rs12564085	0.007351	1	108261079	VAV3	A/G	0.03873	1.09 (1-1.18)	0.03835	0.258965	1.03 (0.94-1.14)	0.5066	0.67981
rs954679	0.008413	1	113049888	RHOC	A/G	0.3891	1 (0.97-1.04)	0.8301	0.8301	0.99 (0.96-1.03)	0.7513	0.7513
rs945508	0.005109	1	155173705	ARHGEF11	A/G	0.4578	1 (0.97-1.03)	0.9282	0.9282	0.99 (0.95-1.03)	0.5294	0.67981
rs1999754	0.03248	1	155208852	ARHGEF11	A/G	0.2033	1.03 (0.99-1.07)	0.0924	0.380965	1.05 (1-1.1)	0.03675	0.346397
rs1572416	0.0272	1	155218678	ARHGEF11	A/C	0.1842	0.96 (0.92-1)	0.02703	0.239799	0.96 (0.92-1.01)	0.08427	0.450516
rs7541702	0.03784	1	155221057	ARHGEF11	G/A	0.1565	0.95 (0.91-0.99)	0.02651	0.239799	0.96 (0.91-1.01)	0.08639	0.452613
rs7550260	0.01728	1	155268285	ARHGEF11	A/C	0.2024	1.04 (1-1.08)	0.05517	0.313534	1.06 (1.01-1.1)	0.0221	0.338733
rs4650945	0.03041	1	172350727	RABGAP1L	A/G	0.4455	1 (0.97-1.03)	0.8767	0.8767	1 (0.96-1.04)	0.8891	0.8891
rs4652234	0.0379	1	172417473	RABGAP1L	G/A	0.4447	1 (0.97-1.03)	0.9105	0.9105	1 (0.96-1.04)	0.8776	0.8776
rs6656188	0.03073	1	172419311	RABGAP1L	G/A	0.445	1 (0.97-1.03)	0.9048	0.9048	1 (0.96-1.04)	0.8819	0.8819
rs6670617	0.02986	1	172513335	RABGAP1L	A/C	0.445	1 (0.97-1.04)	0.8221	0.8221	1 (0.96-1.04)	0.8863	0.8863
rs7523263	0.02725	1	172650303	RABGAP1L	A/G	0.4459	1 (0.97-1.03)	0.8785	0.8785	1 (0.96-1.03)	0.8676	0.8676
rs12143015	0.01733	1	176539535	RASAL2	A/G	0.2189	0.98 (0.95-1.02)	0.3198	0.505604	0.98 (0.94-1.03)	0.4285	0.67778
rs533259	0.02743	1	180815642	RNASEL	A/G	0.06259	0.99 (0.93-1.06)	0.7647	0.7647	0.98 (0.91-1.06)	0.6247	0.697048
rs6664058	0.04598	1	181922901	RGL1	A/G	0.3736	1 (0.97-1.03)	0.9578	0.9578	1.01 (0.97-1.04)	0.7779	0.7779
rs12569261	0.02341	1	204793883	RASSF5	G/A	0.237	0.99 (0.95-1.02)	0.4781	0.526123	0.99 (0.95-1.04)	0.8121	0.8121
rs6693578	0.006909	1	204803880	RASSF5	A/G	0.4793	1.01 (0.98-1.04)	0.598	0.598	1.02 (0.98-1.06)	0.3649	0.657674
rs4845109	0.01763	1	204805209	RASSF5	A/G	0.1736	1.02 (0.97-1.06)	0.4772	0.526123	1.02 (0.97-1.07)	0.5436	0.682087
rs7512541	0.01005	1	204815047	RASSF5	G/A	0.4699	1.01 (0.98-1.04)	0.4785	0.526123	1.02 (0.98-1.06)	0.3397	0.644837
rs17007187	0.03503	1	218466531	RAB3GAP2	C/A	0.0124	0.98 (0.85-1.12)	0.7249	0.7249	1.03 (0.87-1.21)	0.7679	0.7679
rs12999228	0.03415	2	33529944	RASGRP3	C/A	0.1702	0.98 (0.94-1.02)	0.2316	0.505604	0.97 (0.92-1.02)	0.1872	0.606097
rs6543714	0.007845	2	33536107	RASGRP3	C/A	0.1729	0.98 (0.94-1.02)	0.3467	0.514029	0.98 (0.94-1.03)	0.479	0.67981
rs17594260	0.01195	2	33555136	RASGRP3	A/G	0.12	0.98 (0.94-1.03)	0.4465	0.526123	1 (0.94-1.05)	0.8915	0.8915
rs11693332	0.01446	2	33556507	RASGRP3	A/G	0.2416	0.98 (0.95-1.02)	0.3038	0.505604	1 (0.96-1.04)	0.9546	0.9546
rs4670574	0.03704	2	33557627	RASGRP3	G/A	0.1401	0.98 (0.94-1.03)	0.46	0.526123	0.98 (0.93-1.03)	0.4528	0.67981
rs3754823	0.02349	2	33592117	RASGRP3	A/G	0.3723	1.04 (1.01-1.07)	0.01611	0.237387	1.03 (0.99-1.06)	0.2047	0.606097
rs7597095	0.01877	2	33598462	RASGRP3	G/A	0.3406	0.99 (0.96-1.02)	0.5725	0.5725	1 (0.96-1.04)	0.911	0.911
rs11687036	0.02532	2	33606870	RASGRP3	A/G	0.4344	1.01 (0.98-1.04)	0.4134	0.517422	1.01 (0.97-1.05)	0.6395	0.697048
rs11685011	0.02618	2	33611058	RASGRP3	A/C	0.4979	1.02 (0.99-1.05)	0.2009	0.505604	1.03 (0.99-1.07)	0.1388	0.566784
rs7592762	0.0298	2	33617790	RASGRP3	G/A	0.4309	1.02 (0.99-1.05)	0.2265	0.505604	1.01 (0.97-1.05)	0.7049	0.710211
rs2278956	0.01408	2	33638004	RASGRP3	A/G	0.3655	0.99 (0.96-1.02)	0.5448	0.5448	0.98 (0.94-1.02)	0.3187	0.624988
rs7583010	0.01044	2	39114755	SOS1	G/A	0.001053	0.8 (0.5-1.29)	0.3587	0.514029	0.96 (0.56-1.64)	0.8788	0.8788
rs13407659	0.03064	2	39146900	SOS1	G/A	0.0004345	0.97 (0.48-1.98)	0.9429	0.9429	0.9 (0.38-2.11)	0.804	0.804
rs6546132	0.03166	2	65245546	RAB1A	G/A	0.4013	1.01 (0.98-1.04)	0.6767	0.6767	1.01 (0.97-1.05)	0.7161	0.7161
rs7593402	0.02548	2	68826230	ARHGAP25	G/A	0.1175	0.99 (0.95-1.04)	0.7662	0.7662	0.97 (0.91-1.03)	0.2803	0.606097
rs4362592	0.01046	2	68835101	ARHGAP25	A/G	0.09072	0.98 (0.93-1.03)	0.469	0.526123	0.95 (0.89-1.02)	0.1292	0.545889
rs6720182	0.03494	2	68848002	ARHGAP25	A/G	0.1632	0.99 (0.95-1.03)	0.6876	0.6876	0.96 (0.91-1.01)	0.1219	0.53658
rs4627610	0.007882	2	68852423	ARHGAP25	A/G	0.1428	0.99 (0.95-1.04)	0.7536	0.7536	0.98 (0.93-1.04)	0.513	0.67981
rs4854512	0.02666	2	68857961	ARHGAP25	G/A	0.4132	1 (0.97-1.03)	0.8181	0.8181	1 (0.97-1.04)	0.875	0.875
rs4854514	0.02575	2	68859427	ARHGAP25	A/G	0.4119	1 (0.97-1.03)	0.8668	0.8668	1 (0.97-1.04)	0.856	0.856
rs12713665	0.02718	2	68881970	ARHGAP25	C/A	0.06377	0.96 (0.9-1.02)	0.1792	0.502166	0.92 (0.85-0.99)	0.02975	0.338733
rs7573507	0.02192	2	68882220	ARHGAP25	A/G	0.04064	0.97 (0.89-1.04)	0.3757	0.514029	0.91 (0.83-1)	0.05106	0.364123
rs7557267	0.008799	2	68899457	ARHGAP25	A/G	0.06214	0.96 (0.9-1.02)	0.1815	0.502166	0.93 (0.86-1.01)	0.06886	0.4195
rs4848580	0.0003024	2	120717587	RALB	G/A	0.4319	0.99 (0.96-1.02)	0.4308	0.523617	0.99 (0.96-1.03)	0.628	0.697048
rs1370379	0.00789	2	120731059	RALB	G/A	0.3021	0.98 (0.95-1.02)	0.3179	0.505604	1 (0.96-1.04)	0.993	0.993
rs3931840	0.009668	2	120757817	RALB	A/C	0.3016	0.98 (0.95-1.02)	0.3636	0.514029	1 (0.96-1.04)	0.9771	0.9771
rs2043722	0.02312	2	120782781	RALB	A/G	0.1199	0.99 (0.94-1.03)	0.5528	0.5528	0.96 (0.91-1.02)	0.1669	0.606097
rs4849857	0.00347	2	120786392	RALB	G/A	0.2781	0.98 (0.95-1.02)	0.3189	0.505604	0.99 (0.95-1.04)	0.7614	0.7614
rs11673874	0.002577	2	120787281	RALB	G/A	0.2893	0.98 (0.95-1.02)	0.3513	0.514029	0.99 (0.95-1.03)	0.752	0.752
rs7572175	0.02713	2	133049503	GPR39	G/A	0.07179	1.01 (0.95-1.07)	0.8108	0.8108	0.99 (0.92-1.06)	0.7945	0.7945
rs2001202	0.007982	2	133120693	GPR39	A/C	0.4668	0.99 (0.96-1.02)	0.4024	0.514029	0.99 (0.96-1.03)	0.6466	0.697048
rs2874739	0.006878	2	135535377	RAB3GAP1	A/G	0.1325	0.97 (0.93-1.02)	0.2264	0.505604	0.98 (0.92-1.03)	0.3661	0.657674
rs2290518	0.01442	2	135595284	RAB3GAP1	A/G	0.1326	0.98 (0.93-1.02)	0.3002	0.505604	0.98 (0.93-1.03)	0.427	0.67778
rs4954221	0.005878	2	135625932	RAB3GAP1	A/G	0.1315	0.97 (0.93-1.02)	0.1872	0.504656	0.97 (0.92-1.03)	0.3508	0.657313
rs2305248	0.006593	2	135644782	RAB3GAP1	G/A	0.1324	0.97 (0.93-1.02)	0.2126	0.505604	0.98 (0.92-1.03)	0.3775	0.657674
rs10928169	0.04466	2	143770048	ARHGAP15	G/A	0.3854	0.99 (0.96-1.02)	0.634	0.634	0.99 (0.95-1.03)	0.641	0.697048
rs12328672	0.02582	2	143772718	ARHGAP15	G/A	0.1309	1.01 (0.97-1.06)	0.6688	0.6688	1.01 (0.96-1.07)	0.7309	0.7309
rs10496948	0.01177	2	143827923	ARHGAP15	A/G	0.09217	1.02 (0.97-1.08)	0.3982	0.514029	1.01 (0.95-1.08)	0.7277	0.7277
rs10928174	0.02483	2	143898558	ARHGAP15	A/G	0.07042	0.98 (0.92-1.04)	0.43	0.523617	0.98 (0.91-1.06)	0.6283	0.697048
rs10803493	0.02484	2	143915336	ARHGAP15	A/G	0.06933	0.97 (0.91-1.03)	0.3175	0.505604	0.98 (0.91-1.05)	0.5782	0.697048
rs11894738	0.02503	2	143926342	ARHGAP15	A/G	0.07041	0.98 (0.92-1.04)	0.4033	0.514029	0.98 (0.91-1.06)	0.6327	0.697048
rs6735455	0.02238	2	143947016	ARHGAP15	G/A	0.07036	0.97 (0.92-1.03)	0.3671	0.514029	0.98 (0.91-1.05)	0.6062	0.697048
rs10171904	0.02397	2	144099111	ARHGAP15	A/G	0.4066	1.01 (0.97-1.04)	0.7435	0.7435	1 (0.96-1.04)	0.9139	0.9139
rs1996447	0.008334	2	144166651	ARHGAP15	C/A	0.3559	0.99 (0.96-1.02)	0.4983	0.526123	0.99 (0.96-1.03)	0.7165	0.7165
rs10496952	0.01526	2	144211229	ARHGAP15	A/C	0.3688	0.98 (0.95-1.01)	0.2253	0.505604	0.98 (0.94-1.02)	0.2287	0.606097
rs1712957	0.008367	2	144221668	ARHGAP15	A/G	0.4259	0.98 (0.95-1.01)	0.112	0.428193	0.97 (0.93-1.01)	0.08952	0.453542
rs938817	0.01198	2	144222160	ARHGAP15	G/A	0.1766	0.96 (0.92-1)	0.03923	0.258965	0.97 (0.93-1.02)	0.2327	0.606097
rs10193942	0.01086	2	173316447	RAPGEF4	C/A	0.2678	0.99 (0.96-1.03)	0.6443	0.6443	0.99 (0.95-1.03)	0.5218	0.67981
rs2194717	0.02209	2	173398109	RAPGEF4	G/A	0.1129	1.01 (0.96-1.06)	0.7123	0.7123	1.01 (0.95-1.07)	0.7995	0.7995
rs16860975	0.02135	2	173418877	RAPGEF4	G/A	0.1134	1.01 (0.97-1.06)	0.5967	0.5967	1.01 (0.95-1.07)	0.8	0.8
rs2676520	0.006639	2	173463160	RAPGEF4	A/G	0.2031	1.02 (0.98-1.06)	0.2903	0.505604	1.03 (0.98-1.08)	0.2409	0.606097
rs3769245	0.03955	2	173544447	RAPGEF4	G/A	0.06488	1.03 (0.97-1.09)	0.3889	0.514029	1.02 (0.94-1.1)	0.6807	0.70729
rs6751505	0.01229	2	173610109	RAPGEF4	A/G	0.438	1.02 (0.99-1.05)	0.2731	0.505604	1.01 (0.97-1.04)	0.8042	0.8042
rs895583	0.01097	2	173617454	RAPGEF4	G/A	0.1177	0.99 (0.95-1.04)	0.7563	0.7563	1.02 (0.96-1.07)	0.5947	0.697048
rs2469950	0.03762	2	204043802	RAPH1	C/A	0.06581	1.02 (0.96-1.09)	0.4836	0.526123	1.03 (0.96-1.11)	0.4507	0.67981
rs2264235	0.02874	2	204095922	RAPH1	G/A	0.03747	1 (0.92-1.09)	0.9835	0.9835	1.06 (0.96-1.16)	0.2681	0.606097
rs2469961	0.0276	2	204107580	RAPH1	C/A	0.03821	1.01 (0.93-1.09)	0.9048	0.9048	1.06 (0.96-1.17)	0.226	0.606097
rs709937	0.03621	2	233452265	NGEF	A/G	0.3049	0.98 (0.95-1.02)	0.3618	0.514029	0.99 (0.95-1.03)	0.4805	0.67981
rs10184764	0.04755	2	237149595	CXCR7	G/A	0.1453	1.01 (0.96-1.05)	0.7563	0.7563	1.02 (0.97-1.08)	0.4253	0.67778
rs9808217	0.0386	2	237150899	CXCR7	G/A	0.1457	1.01 (0.96-1.05)	0.7922	0.7922	1.02 (0.97-1.07)	0.4617	0.67981
rs10929238	0.03532	2	238174559	RAB17	A/G	0.2082	1.01 (0.97-1.05)	0.6836	0.6836	1.01 (0.96-1.05)	0.7952	0.7952
rs302680	0.0452	2	238456135	RAMP1	G/A	0.1573	0.99 (0.95-1.04)	0.8018	0.8018	1 (0.95-1.05)	0.9663	0.9663
rs1532534	0.0422	3	12611255	RAF1	C/A	0.1993	1.01 (0.97-1.05)	0.7205	0.7205	1.02 (0.97-1.06)	0.5201	0.67981
rs13070718	0.0002574	3	19978232	RAB5A	A/G	0.1333	0.97 (0.92-1.01)	0.1278	0.451386	0.96 (0.91-1.02)	0.1902	0.606097
rs7634934	0.0005751	3	19984235	RAB5A	A/G	0.1812	0.99 (0.95-1.03)	0.5032	0.526123	0.98 (0.94-1.03)	0.4983	0.67981
rs8682	0.02261	3	20001413	RAB5A	C/G	0.1482	0.99 (0.95-1.03)	0.5893	0.5893	1.02 (0.97-1.07)	0.446	0.67981
rs12496392	0.02252	3	20002841	RAB5A	C/A	0.1483	0.99 (0.95-1.03)	0.5537	0.5537	1.02 (0.97-1.07)	0.4495	0.67981
rs13072891	0.004389	3	20003574	RAB5A	G/A	0.3796	1.01 (0.98-1.05)	0.3687	0.514029	1.04 (1-1.08)	0.04806	0.359707
rs13065319	0.001214	3	20007628	RAB5A	A/G	0.181	0.99 (0.95-1.03)	0.5933	0.5933	0.98 (0.94-1.03)	0.5265	0.67981
rs17057445	0.02722	3	56924856	ARHGEF3	G/A	0.1482	1.03 (0.99-1.08)	0.1573	0.501151	1.08 (1.03-1.14)	0.001909	0.12502
rs11925868	0.03479	3	121305025	GPR156	A/C	0.141	1.03 (0.98-1.07)	0.2185	0.505604	1.03 (0.97-1.08)	0.3354	0.641322
rs6785206	0.02053	3	129894714	RAB7A	A/G	0.08975	0.97 (0.92-1.02)	0.2051	0.505604	0.96 (0.9-1.02)	0.1615	0.606097
rs10934861	0.03036	3	129910429	RAB7A	A/G	0.4629	1 (0.97-1.03)	0.9079	0.9079	0.99 (0.96-1.03)	0.6336	0.697048
rs1113479	0.03313	3	135064460	RAB6B	A/G	0.4727	1.01 (0.98-1.04)	0.6617	0.6617	1.02 (0.98-1.06)	0.3646	0.657674
rs9865971	0.0328	3	142720549	RASA2	G/A	0.3191	1 (0.97-1.04)	0.8753	0.8753	0.99 (0.96-1.03)	0.768	0.768
rs9850416	0.03334	3	142754906	RASA2	A/G	0.3192	1 (0.97-1.04)	0.899	0.899	0.99 (0.95-1.03)	0.7187	0.7187
rs295320	0.01437	3	142807246	RASA2	G/A	0.3846	1 (0.96-1.03)	0.7809	0.7809	0.99 (0.95-1.03)	0.5435	0.682087
rs295323	0.01352	3	142810164	RASA2	A/G	0.38	1 (0.97-1.03)	0.9083	0.9083	0.99 (0.95-1.03)	0.6464	0.697048
rs295301	0.04779	3	142821331	RASA2	A/G	0.3431	1.01 (0.98-1.04)	0.6673	0.6673	1 (0.96-1.04)	0.9312	0.9312
rs295302	0.009194	3	142821687	RASA2	A/C	0.2295	1 (0.97-1.04)	0.9292	0.9292	1.01 (0.97-1.06)	0.5764	0.697048
rs13072855	0.04702	3	142826888	RASA2	G/A	0.06313	0.95 (0.89-1.01)	0.1075	0.418599	0.96 (0.89-1.03)	0.2551	0.606097
rs6800715	0.02298	3	154418657	RAP2B	G/A	0.1923	0.96 (0.92-0.99)	0.02432	0.239799	0.95 (0.9-0.99)	0.02381	0.338733
rs6440853	0.0243	3	154419908	RAP2B	A/G	0.0684	0.94 (0.89-1)	0.06514	0.35121	0.94 (0.88-1.01)	0.1009	0.480576
rs6444967	0.009841	3	172357092	TNIK	C/A	0.2028	0.99 (0.96-1.03)	0.6756	0.6756	0.97 (0.93-1.02)	0.2468	0.606097
rs11717665	0.0002192	3	172490610	TNIK	A/G	0.0272	0.87 (0.79-0.96)	0.00455	0.139081	0.89 (0.8-1)	0.0455	0.350563
rs6780532	0.007335	3	172554921	TNIK	A/C	0.3308	0.99 (0.96-1.02)	0.4622	0.526123	1.02 (0.98-1.06)	0.3743	0.657674
rs9883206	0.03985	3	172584250	TNIK	G/A	0.244	0.99 (0.95-1.03)	0.5578	0.5578	1.03 (0.99-1.07)	0.2065	0.606097
rs9862688	0.01564	3	172606490	TNIK	A/G	0.2391	0.99 (0.96-1.03)	0.7483	0.7483	0.99 (0.94-1.03)	0.5081	0.67981
rs1010211	0.01854	3	172614334	TNIK	A/G	0.07328	0.96 (0.9-1.02)	0.1549	0.501151	0.96 (0.89-1.03)	0.213	0.606097
rs9875030	0.009933	3	172628405	TNIK	G/A	0.363	0.98 (0.95-1.02)	0.2926	0.505604	0.99 (0.96-1.03)	0.7807	0.7807
rs9831563	0.02742	3	194898444	OPA1	A/G	0.3482	0.99 (0.96-1.02)	0.5303	0.5303	0.99 (0.95-1.02)	0.4639	0.67981
rs7699978	0.02032	4	87155080	ARHGAP24	A/C	0.1267	1.03 (0.98-1.08)	0.2533	0.505604	1.03 (0.98-1.09)	0.2785	0.606097
rs250846	0.03949	5	14169980	TRIO	A/G	0.4996	1.01 (0.98-1.04)	0.6389	0.6389	0.99 (0.96-1.03)	0.7096	0.712208
rs252217	0.001344	5	14171565	TRIO	C/A	0.445	0.99 (0.96-1.02)	0.5441	0.5441	0.98 (0.94-1.02)	0.2321	0.606097
rs32595	0.04076	5	14217260	TRIO	A/G	0.3658	1 (0.97-1.04)	0.8015	0.8015	1.01 (0.97-1.05)	0.5799	0.697048
rs26286	0.001106	5	14219402	TRIO	A/C	0.4687	1.01 (0.98-1.04)	0.558	0.558	1.02 (0.98-1.05)	0.4372	0.67981
rs17302526	0.01708	5	14339802	TRIO	A/G	0.04613	0.97 (0.9-1.04)	0.393	0.514029	0.95 (0.87-1.04)	0.2571	0.606097
rs773765	0.01747	5	14344614	TRIO	G/A	0.04565	0.95 (0.88-1.02)	0.1683	0.502166	0.99 (0.91-1.08)	0.8082	0.8082
rs17303923	0.02012	5	14379046	TRIO	G/A	0.2015	0.99 (0.95-1.02)	0.4614	0.526123	1 (0.96-1.05)	0.9131	0.9131
rs4702029	0.03174	5	14399413	TRIO	A/G	0.2839	0.98 (0.95-1.01)	0.2501	0.505604	1 (0.96-1.04)	0.9665	0.9665
rs16903421	0.02501	5	14420568	TRIO	G/A	0.04714	0.95 (0.88-1.02)	0.1464	0.493641	1 (0.92-1.09)	0.9726	0.9726
rs30791	0.02252	5	14437453	TRIO	C/A	0.2799	0.98 (0.95-1.01)	0.1926	0.505604	1 (0.96-1.04)	0.8624	0.8624
rs28343	0.02638	5	14453123	TRIO	A/G	0.2799	0.98 (0.95-1.01)	0.2562	0.505604	1 (0.96-1.04)	0.9723	0.9723
rs42404	0.005282	5	14470929	TRIO	G/A	0.3517	0.98 (0.95-1.02)	0.3245	0.509206	1 (0.96-1.04)	0.9954	0.9954
rs10056415	0.007757	5	14474026	TRIO	G/A	0.06157	0.98 (0.92-1.05)	0.634	0.634	1.01 (0.94-1.09)	0.7635	0.7635
rs890937	0.005199	5	14476836	TRIO	A/G	0.3426	0.98 (0.95-1.02)	0.3148	0.505604	1 (0.96-1.04)	0.999	0.999
rs358753	0.03406	5	14479611	TRIO	C/A	0.3892	0.99 (0.95-1.02)	0.3418	0.513367	1 (0.96-1.04)	0.9411	0.9411
rs27114	0.02317	5	14498585	TRIO	G/A	0.411	0.98 (0.95-1.01)	0.1775	0.502166	0.99 (0.95-1.03)	0.496	0.67981
rs27111	0.02905	5	14503135	TRIO	A/G	0.1806	1 (0.96-1.04)	0.8951	0.8951	1.02 (0.97-1.07)	0.4894	0.67981
rs32815	0.02089	5	14567308	TRIO	G/A	0.11	1 (0.95-1.05)	0.9671	0.9671	1 (0.95-1.06)	0.8926	0.8926
rs35000	0.01761	5	80312992	RASGRF2	A/G	0.3353	1.01 (0.97-1.04)	0.7265	0.7265	1.01 (0.97-1.05)	0.6259	0.697048
rs857671	0.03064	5	80313968	RASGRF2	A/G	0.3393	1.01 (0.98-1.04)	0.6248	0.6248	1.01 (0.97-1.05)	0.6016	0.697048
rs520336	0.03469	5	80356447	RASGRF2	G/A	0.3957	1.01 (0.98-1.05)	0.3876	0.514029	1.02 (0.98-1.06)	0.2628	0.606097
rs10045942	0.01757	5	80394137	RASGRF2	A/G	0.2376	1 (0.96-1.03)	0.8477	0.8477	0.99 (0.95-1.03)	0.6394	0.697048
rs26900	0.03716	5	80396677	RASGRF2	G/A	0.3473	1.02 (0.99-1.05)	0.2932	0.505604	1.04 (1-1.08)	0.05143	0.364123
rs153227	0.009291	5	80404068	RASGRF2	G/A	0.2294	1.04 (1-1.07)	0.06078	0.336326	1.06 (1.02-1.11)	0.006245	0.204492
rs153226	0.006495	5	80406671	RASGRF2	G/A	0.3873	1.03 (1-1.06)	0.08804	0.370249	1.04 (1.01-1.08)	0.02423	0.338733
rs190409	0.01402	5	80407077	RASGRF2	A/G	0.4454	0.99 (0.96-1.02)	0.3974	0.514029	0.97 (0.94-1.01)	0.1229	0.53658
rs27650	0.03675	5	80411898	RASGRF2	A/G	0.4736	0.99 (0.96-1.02)	0.3324	0.510404	0.97 (0.94-1.01)	0.1597	0.606097
rs26418	0.01234	5	80414865	RASGRF2	A/G	0.2163	1.02 (0.98-1.06)	0.2542	0.505604	1.05 (1-1.09)	0.04535	0.350563
rs6869328	0.02612	5	80416920	RASGRF2	C/A	0.07843	1 (0.94-1.06)	0.9456	0.9456	1 (0.93-1.07)	0.9281	0.9281
rs540564	0.01229	5	80439148	RASGRF2	A/G	0.3815	0.97 (0.94-1)	0.04808	0.289696	0.96 (0.92-1)	0.02675	0.338733
rs4704699	0.01366	5	80446032	RASGRF2	A/G	0.4413	0.98 (0.95-1.01)	0.1643	0.502166	0.97 (0.94-1.01)	0.114	0.514885
rs248989	0.02	5	80472340	RASGRF2	G/A	0.4596	1.02 (0.99-1.05)	0.3193	0.505604	1.03 (0.99-1.06)	0.1806	0.606097
rs248988	0.0127	5	80473035	RASGRF2	A/C	0.4654	1.01 (0.98-1.04)	0.4102	0.516491	1.03 (0.99-1.07)	0.1106	0.508293
rs34117	0.01705	5	80477537	RASGRF2	A/G	0.413	1.02 (0.99-1.05)	0.3169	0.505604	1.05 (1.01-1.09)	0.01205	0.315661
rs1379271	0.01139	5	80504373	RASGRF2	G/A	0.2145	0.97 (0.93-1)	0.06804	0.357675	0.96 (0.92-1.01)	0.09003	0.453542
rs10514211	0.01813	5	80518270	RASGRF2	G/A	0.09491	1 (0.95-1.06)	0.8711	0.8711	0.97 (0.92-1.04)	0.424	0.67778
rs17214843	0.03263	5	80518292	RASGRF2	G/A	0.08279	0.99 (0.94-1.05)	0.7801	0.7801	0.96 (0.9-1.03)	0.2303	0.606097
rs1567348	0.008347	5	86621630	RASA1	A/G	0.4114	0.98 (0.95-1.02)	0.3045	0.505604	0.98 (0.94-1.02)	0.2842	0.606097
rs3752862	0.005574	5	86669729	RASA1	A/G	0.4824	0.99 (0.96-1.02)	0.654	0.654	0.98 (0.95-1.02)	0.3834	0.660757
rs10067098	0.004186	5	86706726	RASA1	G/A	0.455	0.99 (0.96-1.02)	0.396	0.514029	0.98 (0.94-1.02)	0.2433	0.606097
rs3827607	0.003482	5	86712976	RASA1	A/G	0.4089	0.99 (0.96-1.02)	0.4641	0.526123	0.98 (0.94-1.02)	0.2397	0.606097
rs12516352	0.007722	5	173937149	MSX2	G/A	0.03303	0.9 (0.82-0.98)	0.01268	0.237387	0.84 (0.76-0.94)	0.001361	0.118842
rs11746728	0.02599	5	173983412	MSX2	G/A	0.3493	0.96 (0.93-0.99)	0.01228	0.237387	0.97 (0.93-1.01)	0.09407	0.464953
rs3940643	0.005611	5	179517915	RASGEF1C	A/G	0.282	0.97 (0.94-1.01)	0.09584	0.386784	0.98 (0.94-1.02)	0.2664	0.606097
rs7720463	0.02701	5	179519062	RASGEF1C	A/G	0.2217	0.96 (0.92-0.99)	0.02145	0.237387	0.95 (0.91-1)	0.03335	0.338733
rs4700718	0.02213	5	179522474	RASGEF1C	A/G	0.3116	0.98 (0.95-1.01)	0.1871	0.504656	0.96 (0.93-1)	0.07274	0.433066
rs7718088	0.02288	5	179523558	RASGEF1C	A/G	0.3139	0.98 (0.94-1.01)	0.1457	0.493641	0.96 (0.93-1)	0.06496	0.412586
rs11749727	0.007025	5	179540966	RASGEF1C	G/A	0.3777	0.96 (0.93-0.99)	0.01809	0.237387	0.95 (0.91-0.98)	0.003582	0.15639
rs6919828	0.01096	6	47302576	GPR110	A/G	0.088	1 (0.94-1.05)	0.9108	0.9108	1.02 (0.96-1.09)	0.529	0.67981
rs875128	0.02256	6	129891202	ARHGAP18	C/A	0.4686	1.03 (1-1.06)	0.07978	0.364444	1.03 (0.99-1.07)	0.1328	0.552193
rs2812489	0.03625	6	129899810	ARHGAP18	A/G	0.3396	1.01 (0.98-1.04)	0.4957	0.526123	1.02 (0.98-1.06)	0.2371	0.606097
rs12203956	0.03209	6	129906258	ARHGAP18	G/A	0.07258	0.93 (0.87-0.98)	0.01081	0.237387	0.91 (0.85-0.98)	0.01404	0.334355
rs1746469	0.005717	6	131544464	AKAP7	G/A	0.3393	1.03 (1-1.06)	0.08146	0.364444	1.02 (0.98-1.06)	0.3197	0.624988
rs1190788	0.006358	6	131562348	AKAP7	A/G	0.3582	1.03 (1-1.07)	0.03941	0.258965	1.02 (0.98-1.06)	0.2551	0.606097
rs1190806	0.007943	6	131567377	AKAP7	G/A	0.3588	1.03 (1-1.07)	0.04822	0.289696	1.02 (0.98-1.06)	0.2869	0.606097
rs4629710	0.006968	6	131605270	AKAP7	A/G	0.2018	0.99 (0.95-1.03)	0.6571	0.6571	0.98 (0.93-1.02)	0.3109	0.621703
rs13195700	0.00609	6	131626992	AKAP7	A/G	0.3497	1.03 (1-1.06)	0.09749	0.386784	1.01 (0.97-1.05)	0.5529	0.683194
rs7807765	0.01572	7	91369910	AKAP9	A/C	0.4998	0.99 (0.97-1.03)	0.7344	0.7344	0.99 (0.95-1.03)	0.5467	0.682087
rs221259	0.009445	7	157028499	PTPRN2	A/C	0.165	1.01 (0.97-1.06)	0.5238	0.526123	1.03 (0.98-1.08)	0.3311	0.637755
rs221305	0.01085	7	157064274	PTPRN2	G/A	0.1711	1.03 (0.98-1.07)	0.2346	0.505604	0.99 (0.95-1.05)	0.8294	0.8294
rs4716760	0.01378	7	157069405	PTPRN2	A/G	0.1715	1.03 (0.99-1.07)	0.1729	0.502166	1 (0.95-1.05)	0.9433	0.9433
rs10274279	0.02135	7	157080202	PTPRN2	G/A	0.132	1.02 (0.98-1.07)	0.3307	0.510404	0.98 (0.93-1.04)	0.5366	0.682087
rs10949655	0.005398	7	157085824	PTPRN2	A/C	0.1552	1.02 (0.98-1.07)	0.306	0.505604	0.99 (0.94-1.05)	0.7813	0.7813
rs1268391	0.006762	7	157111665	PTPRN2	G/A	0.3228	0.97 (0.94-1)	0.04694	0.289696	0.96 (0.92-1)	0.0283	0.338733
rs1263542	0.004942	7	157113869	PTPRN2	G/A	0.2646	0.97 (0.93-1)	0.05165	0.301684	0.95 (0.91-0.99)	0.01976	0.338733
rs1242787	0.004747	7	157188115	PTPRN2	G/A	0.1449	0.99 (0.95-1.03)	0.6445	0.6445	1 (0.95-1.05)	0.8752	0.8752
rs1242775	0.03985	7	157224887	PTPRN2	A/C	0.3697	0.98 (0.94-1.01)	0.1151	0.432186	0.98 (0.94-1.01)	0.2051	0.606097
rs887417	0.01753	7	157239655	PTPRN2	A/G	0.1077	0.98 (0.93-1.03)	0.4362	0.526123	0.99 (0.93-1.05)	0.6905	0.70729
rs10272636	0.006832	7	157240145	PTPRN2	G/A	0.06057	1 (0.94-1.06)	0.9174	0.9174	0.99 (0.92-1.07)	0.8427	0.8427
rs1638751	0.02218	7	157256010	PTPRN2	G/A	0.08639	0.96 (0.91-1.02)	0.1716	0.502166	0.98 (0.92-1.04)	0.5083	0.67981
rs7802866	0.006953	7	157381842	PTPRN2	A/G	0.1866	1.02 (0.98-1.06)	0.2829	0.505604	1.01 (0.96-1.05)	0.8196	0.8196
rs12540633	0.01222	7	157387753	PTPRN2	A/G	0.4382	1.01 (0.98-1.04)	0.6164	0.6164	1.02 (0.99-1.06)	0.2192	0.606097
rs10949670	0.04021	7	157388704	PTPRN2	A/G	0.3838	0.99 (0.96-1.03)	0.6687	0.6687	0.98 (0.95-1.02)	0.3649	0.657674
rs10245118	0.03112	7	157403489	PTPRN2	A/G	0.1717	1.02 (0.98-1.06)	0.4165	0.518218	1.01 (0.96-1.06)	0.7909	0.7909
rs13241820	0.01095	7	157429494	PTPRN2	G/A	0.439	0.99 (0.96-1.03)	0.7108	0.7108	0.99 (0.95-1.02)	0.46	0.67981
rs12698114	0.01036	7	157434896	PTPRN2	A/G	0.4366	1 (0.97-1.03)	0.7669	0.7669	0.99 (0.95-1.03)	0.5058	0.67981
rs4019377	0.02007	7	157448576	PTPRN2	A/G	0.4454	0.99 (0.96-1.02)	0.5001	0.526123	0.97 (0.93-1)	0.06615	0.412586
rs7777968	0.002361	7	157773101	PTPRN2	G/A	0.2519	1 (0.96-1.03)	0.8654	0.8654	0.99 (0.95-1.03)	0.5959	0.697048
rs4909062	4.398e-05	7	157796605	PTPRN2	G/A	0.4987	1.01 (0.98-1.04)	0.6815	0.6815	1 (0.96-1.04)	0.9993	0.9993
rs10275374	0.01687	7	157840467	PTPRN2	A/G	0.01903	0.98 (0.87-1.09)	0.6772	0.6772	1.05 (0.92-1.19)	0.5125	0.67981
rs10866819	0.02466	8	22973638	RHOBTB2	G/A	0.3594	0.98 (0.95-1.02)	0.3371	0.510404	0.98 (0.95-1.02)	0.4001	0.665343
rs13274293	0.008601	8	69084824	PREX2	A/G	0.08358	1 (0.95-1.06)	0.9426	0.9426	1 (0.94-1.07)	0.9828	0.9828
rs10957414	0.02192	8	69102194	PREX2	G/A	0.116	1 (0.96-1.05)	0.9524	0.9524	0.99 (0.93-1.05)	0.6623	0.698873
rs6984885	0.009919	8	69240239	PREX2	A/G	0.1254	0.98 (0.94-1.03)	0.3825	0.514029	0.97 (0.92-1.02)	0.2589	0.606097
rs1404598	0.01452	8	69294587	PREX2	A/G	0.3111	1 (0.97-1.03)	0.9868	0.9868	1 (0.96-1.04)	0.9272	0.9272
rs7875501	0.03956	9	84581610	RASEF	G/A	0.1509	0.98 (0.94-1.02)	0.2641	0.505604	0.95 (0.9-1)	0.05764	0.387162
rs4877708	0.03101	9	84589743	RASEF	A/C	0.4143	0.99 (0.96-1.02)	0.5256	0.526123	0.99 (0.96-1.03)	0.7362	0.7362
rs1040870	0.02864	9	84605357	RASEF	A/G	0.421	0.99 (0.96-1.02)	0.5563	0.5563	0.99 (0.96-1.03)	0.7729	0.7729
rs11139810	0.03692	9	84632239	RASEF	G/A	0.08683	1.05 (1-1.11)	0.07035	0.360798	1.08 (1.01-1.15)	0.02338	0.338733
rs2224524	0.03966	9	84647880	RASEF	A/G	0.4231	0.99 (0.96-1.02)	0.4283	0.523617	0.99 (0.95-1.03)	0.5954	0.697048
rs10867919	0.03233	9	84772537	RASEF	C/A	0.06392	1.02 (0.96-1.08)	0.5575	0.5575	1.03 (0.96-1.11)	0.399	0.665343
rs4391505	0.01602	9	84792109	RASEF	A/G	0.4632	1 (0.97-1.04)	0.8073	0.8073	1.02 (0.98-1.06)	0.2797	0.606097
rs4146960	0.01351	9	84817228	RASEF	G/A	0.4911	1 (0.97-1.03)	0.9033	0.9033	1.01 (0.97-1.05)	0.6945	0.707901
rs7019227	0.01709	9	84829079	RASEF	A/G	0.4886	1 (0.97-1.03)	0.9518	0.9518	1.01 (0.97-1.05)	0.6286	0.697048
rs2062761	0.01164	9	84839371	RASEF	G/A	0.4482	1 (0.97-1.03)	0.8992	0.8992	1.01 (0.97-1.05)	0.6064	0.697048
rs1995423	0.02002	9	84870238	RASEF	A/G	0.4515	1 (0.97-1.03)	0.924	0.924	1.01 (0.98-1.05)	0.4554	0.67981
rs10760394	0.01025	9	127002354	RABEPK	G/A	0.4566	0.98 (0.95-1.01)	0.2429	0.505604	0.98 (0.94-1.01)	0.2017	0.606097
rs420423	0.02748	9	127009606	RABEPK	A/G	0.4597	0.99 (0.96-1.02)	0.3369	0.510404	0.98 (0.94-1.02)	0.2664	0.606097
rs4837122	0.007522	9	128756921	RALGPS1	A/C	0.2149	1.01 (0.97-1.05)	0.661	0.661	1.03 (0.98-1.08)	0.2286	0.606097
rs10513473	0.007565	9	128793172	RALGPS1	A/G	0.2149	1.01 (0.97-1.05)	0.7373	0.7373	1.03 (0.98-1.07)	0.2785	0.606097
rs10739688	0.004583	9	128812316	RALGPS1	A/G	0.2125	1.01 (0.97-1.05)	0.6381	0.6381	1.03 (0.98-1.07)	0.2669	0.606097
rs2151272	0.03105	9	128988592	RALGPS1	G/A	0.2865	1.01 (0.98-1.04)	0.6196	0.6196	1.01 (0.97-1.05)	0.6586	0.698487
rs10819272	0.02822	9	128994155	RALGPS1	G/A	0.4076	1.01 (0.98-1.05)	0.3994	0.514029	1.02 (0.98-1.06)	0.285	0.606097
rs875382	0.0008322	9	129000973	RALGPS1	A/G	0.2434	1.02 (0.98-1.05)	0.4244	0.523617	1.03 (0.98-1.07)	0.2123	0.606097
rs10987574	0.02805	9	129007959	RALGPS1	A/G	0.207	1.01 (0.97-1.05)	0.5639	0.5639	1.03 (0.99-1.08)	0.1428	0.566784
rs2779710	0.01283	9	129015426	RALGPS1	A/G	0.4728	1 (0.97-1.03)	0.7987	0.7987	1 (0.96-1.04)	0.9499	0.9499
rs2510262	0.03328	9	135656304	VAV2	A/G	0.1696	1.04 (1-1.08)	0.07632	0.363399	1.02 (0.97-1.07)	0.5024	0.67981
rs756777	0.006217	9	135668901	VAV2	G/A	0.2068	0.98 (0.94-1.02)	0.2828	0.505604	0.96 (0.92-1.01)	0.07781	0.442934
rs12552884	0.01414	9	135670636	VAV2	G/A	0.169	0.97 (0.93-1.01)	0.1617	0.502166	0.97 (0.92-1.02)	0.1965	0.606097
rs2428082	0.02678	9	135748407	VAV2	A/G	0.357	0.99 (0.96-1.02)	0.5555	0.5555	1.01 (0.97-1.05)	0.654	0.697706
rs10114577	0.01223	9	135761140	VAV2	G/A	0.1692	0.98 (0.95-1.03)	0.451	0.526123	0.97 (0.92-1.02)	0.1831	0.606097
rs608402	0.01958	9	135768974	VAV2	A/G	0.3857	1.03 (1-1.06)	0.08334	0.365087	1.02 (0.98-1.06)	0.3002	0.615299
rs1062225	0.0338	10	49313232	ARHGAP22	G/A	0.1304	1 (0.95-1.04)	0.8894	0.8894	1.01 (0.96-1.07)	0.7334	0.7334
rs2689694	0.03844	10	95927934	PLCE1	A/G	0.392	0.98 (0.95-1.01)	0.2601	0.505604	0.98 (0.94-1.02)	0.3014	0.615299
rs12248509	0.01771	10	95987180	PLCE1	A/G	0.05209	0.92 (0.86-0.99)	0.02036	0.237387	0.91 (0.84-0.99)	0.03109	0.338733
rs7894232	0.02655	10	98945589	ARHGAP19	A/G	0.2344	0.98 (0.94-1.02)	0.258	0.505604	0.99 (0.95-1.03)	0.6192	0.697048
rs701808	0.02485	10	98948024	ARHGAP19	G/A	0.4726	1.01 (0.98-1.04)	0.4918	0.526123	0.99 (0.96-1.03)	0.6721	0.704251
rs2253104	0.007407	11	6456885	ARFIP2	A/G	0.4632	0.97 (0.94-1)	0.07609	0.363399	0.98 (0.94-1.01)	0.1837	0.606097
rs1481871	0.007549	11	13147869	RASSF10	C/A	0.4131	1.03 (1-1.07)	0.03374	0.253379	1.03 (0.99-1.07)	0.1738	0.606097
rs748923	0.03781	11	13162736	RASSF10	A/C	0.09715	1.06 (1.01-1.11)	0.02915	0.245179	1.04 (0.98-1.11)	0.1792	0.606097
rs12421920	0.01927	11	13206335	RASSF10	G/A	0.08917	1.06 (1.01-1.12)	0.02624	0.239799	1.06 (0.99-1.13)	0.09596	0.465511
rs4360702	0.0379	11	62989939	HRASLS5	G/A	0.1078	1 (0.95-1.05)	0.9805	0.9805	0.98 (0.92-1.04)	0.5266	0.67981
rs11227678	0.04299	11	66599045	RHOD	A/G	0.08249	0.98 (0.92-1.03)	0.3931	0.514029	0.97 (0.91-1.04)	0.4011	0.665343
rs4244818	0.009487	11	66601938	RHOD	G/A	0.1766	. (.-.)	NA		. (.-.)	NA
rs3930078	0.01631	11	110084607	ARHGAP20	A/G	0.1626	1.01 (0.97-1.05)	0.5711	0.5711	1.02 (0.97-1.07)	0.5657	0.695729
rs2270134	0.0283	12	4629049	AKAP3	A/G	0.4546	0.96 (0.94-0.99)	0.02068	0.237387	0.97 (0.94-1.01)	0.1083	0.50661
rs10845664	0.02052	12	12934386	GPRC5A	G/A	0.1165	1 (0.96-1.05)	0.8893	0.8893	1.01 (0.95-1.07)	0.8311	0.8311
rs2160667	0.02297	12	12943944	GPRC5A	G/A	0.195	0.99 (0.95-1.02)	0.4549	0.526123	1 (0.96-1.05)	0.9247	0.9247
rs10845667	0.02522	12	12945176	GPRC5A	C/A	0.1009	1.01 (0.96-1.06)	0.8325	0.8325	1.01 (0.95-1.07)	0.7916	0.7916
rs4528424	0.04561	12	25319229	KRAS	G/A	0.4071	0.97 (0.94-1)	0.07777	0.363399	0.95 (0.91-0.98)	0.004805	0.179816
rs10505978	0.02538	12	25336389	KRAS	G/A	0.05153	1.02 (0.95-1.09)	0.5745	0.5745	1.05 (0.97-1.14)	0.2481	0.606097
rs4963872	0.01776	12	25375524	KRAS	A/G	0.06351	1.05 (0.99-1.12)	0.1236	0.451386	1.03 (0.95-1.1)	0.5203	0.67981
rs2723260	0.01646	12	38887975	LRRK2	A/C	0.1029	1.02 (0.97-1.07)	0.4511	0.526123	1.02 (0.96-1.09)	0.4807	0.67981
rs11175655	0.01917	12	38909994	LRRK2	A/G	0.1175	0.97 (0.93-1.02)	0.2554	0.505604	0.98 (0.92-1.03)	0.4013	0.665343
rs12426891	0.03724	12	38947548	LRRK2	G/A	0.06971	1.02 (0.96-1.08)	0.5728	0.5728	1.03 (0.96-1.1)	0.4566	0.67981
rs10506151	0.02369	12	38957265	LRRK2	A/C	0.1573	0.98 (0.94-1.02)	0.267	0.505604	0.96 (0.91-1.01)	0.1275	0.545889
rs10784498	0.03214	12	38983701	LRRK2	A/G	0.3459	0.99 (0.95-1.02)	0.3634	0.514029	0.98 (0.95-1.02)	0.4228	0.67778
rs11175964	0.02808	12	38989254	LRRK2	A/G	0.06928	1.02 (0.96-1.08)	0.5396	0.5396	1.03 (0.95-1.1)	0.4872	0.67981
rs4768230	0.03388	12	39001569	LRRK2	A/G	0.3097	0.99 (0.95-1.02)	0.375	0.514029	0.98 (0.94-1.02)	0.3015	0.615299
rs11176052	0.0232	12	39010167	LRRK2	A/G	0.2439	0.98 (0.94-1.01)	0.2017	0.505604	0.98 (0.94-1.03)	0.4156	0.67778
rs11176053	0.02381	12	39010297	LRRK2	A/G	0.2439	0.98 (0.94-1.01)	0.2055	0.505604	0.98 (0.94-1.03)	0.4295	0.67778
rs10878386	0.01546	12	39012195	LRRK2	G/A	0.07446	1.01 (0.96-1.07)	0.6741	0.6741	1.02 (0.95-1.09)	0.6159	0.697048
rs2404835	0.03233	12	39016730	LRRK2	A/G	0.3317	1.03 (0.99-1.06)	0.1288	0.451386	1.01 (0.97-1.05)	0.5023	0.67981
rs10467147	0.002377	12	39053629	LRRK2	A/G	0.3136	0.98 (0.95-1.01)	0.2343	0.505604	0.97 (0.94-1.01)	0.1668	0.606097
rs11176330	0.003416	12	39058810	LRRK2	A/G	0.1804	1 (0.96-1.04)	0.8717	0.8717	1.03 (0.98-1.08)	0.3022	0.615299
rs3213122	0.006269	12	54649933	RAB5B	A/C	0.07867	1.02 (0.96-1.08)	0.5793	0.5793	1.02 (0.95-1.09)	0.6532	0.697706
rs3764040	0.03493	12	84790256	RASSF9	G/A	0.157	0.99 (0.95-1.04)	0.7789	0.7789	1 (0.95-1.05)	0.9742	0.9742
rs1535541	0.002064	14	31904894	AKAP6	A/G	0.02303	1.06 (0.96-1.17)	0.2445	0.505604	1.06 (0.94-1.19)	0.3745	0.657674
rs8014419	0.01957	14	31967501	AKAP6	G/A	0.04635	1.02 (0.95-1.1)	0.5652	0.5652	0.98 (0.89-1.07)	0.5845	0.697048
rs2383347	0.02403	14	32107272	AKAP6	A/C	0.1145	1.02 (0.97-1.07)	0.3722	0.514029	1.05 (0.99-1.11)	0.07787	0.442934
rs927062	0.0288	14	32164800	AKAP6	G/A	0.2099	0.94 (0.9-0.97)	0.0005859	0.0615995	0.93 (0.89-0.98)	0.002479	0.129879
rs1955513	0.04905	14	32245693	AKAP6	C/A	0.07198	0.9 (0.85-0.95)	0.0003285	0.0615995	0.89 (0.83-0.95)	0.001018	0.118842
rs11622943	0.01882	14	32315848	AKAP6	G/A	0.3846	1 (0.97-1.03)	0.8638	0.8638	0.98 (0.94-1.02)	0.2633	0.606097
rs745686	0.01797	14	64000385	AKAP5	G/A	0.3407	1 (0.97-1.03)	0.9286	0.9286	1 (0.96-1.04)	0.9134	0.9134
rs2467307	0.01915	17	5109042	RABEP1	A/G	0.03226	1.05 (0.96-1.15)	0.2555	0.505604	1.05 (0.95-1.16)	0.3681	0.657674
rs41283391		17	6861612	RNASEK	A/G	0.06712	1.02 (0.96-1.09)	0.4938	0.526123	0.98 (0.91-1.06)	0.6034	0.697048
rs12944238	0.0451	17	26787499	RAB11FIP4	A/G	0.1061	1.01 (0.97-1.07)	0.5837	0.5837	1.04 (0.98-1.1)	0.1937	0.606097
rs178853	0.00572	17	26791321	RAB11FIP4	A/G	0.4938	0.96 (0.94-0.99)	0.01864	0.237387	0.96 (0.93-1)	0.04352	0.350563
rs178858	0.02908	17	26797877	RAB11FIP4	A/G	0.3579	1.05 (1.02-1.08)	0.003882	0.139081	1.04 (1-1.08)	0.0658	0.412586
rs178870	0.009673	17	26807370	RAB11FIP4	A/G	0.4495	0.96 (0.93-0.99)	0.01688	0.237387	0.96 (0.93-1)	0.04273	0.350563
rs178873	0.002909	17	26808557	RAB11FIP4	A/G	0.4909	1.04 (1-1.07)	0.02737	0.239799	1.04 (1-1.08)	0.03967	0.346397
rs178900	0.004982	17	26824782	RAB11FIP4	G/A	0.2497	1.02 (0.98-1.06)	0.3077	0.505604	1.01 (0.97-1.05)	0.6444	0.697048
rs12603327	0.03836	17	37544078	RAB5C	G/A	0.229	1.01 (0.97-1.04)	0.7861	0.7861	1.02 (0.98-1.06)	0.3995	0.665343
rs512038	0.00504	17	70160535	RAB37	A/G	0.2351	0.97 (0.94-1.01)	0.1568	0.501151	0.96 (0.92-1)	0.05542	0.382047
rs11869115	0.01059	17	70241829	RAB37	G/A	0.1015	1.03 (0.98-1.08)	0.2529	0.505604	1.03 (0.97-1.09)	0.3753	0.657674
rs7228240	0.0106	18	9719894	RAB31	G/A	0.2121	1.03 (0.99-1.07)	0.1775	0.502166	1.05 (1.01-1.1)	0.02765	0.338733
rs11873271	0.01699	18	9726809	RAB31	A/G	0.1687	0.98 (0.95-1.03)	0.445	0.526123	1.02 (0.97-1.07)	0.5469	0.682087
rs11663730	0.005327	18	9755845	RAB31	G/A	0.03902	1.04 (0.96-1.12)	0.3561	0.514029	0.98 (0.89-1.08)	0.6757	0.705202
rs17202361	0.02695	18	16872068	ROCK1	G/A	0.0419	1.09 (1.01-1.17)	0.03236	0.253379	1.05 (0.96-1.15)	0.303	0.615299
rs1006881	0.01859	18	16935291	ROCK1	A/G	0.04254	1.08 (1.01-1.17)	0.03607	0.258965	1.06 (0.96-1.16)	0.2372	0.606097
rs11874761	0.01599	18	16945764	ROCK1	A/G	0.03364	. (.-.)	NA		. (.-.)	NA
rs2012194	0.01476	18	50678068	RAB27B	G/A	0.04526	0.98 (0.91-1.05)	0.5314	0.5314	0.99 (0.91-1.08)	0.8076	0.8076
rs11879985	0.01997	19	7326223	ARHGEF18	A/G	0.05279	1.01 (0.95-1.08)	0.7098	0.7098	1.03 (0.95-1.12)	0.4497	0.67981
rs8100029	0.01642	19	7354832	ARHGEF18	G/A	0.03847	0.97 (0.89-1.05)	0.4058	0.514029	0.97 (0.89-1.07)	0.5949	0.697048
rs2432103	0.04721	19	7372965	ARHGEF18	G/A	0.0348	0.97 (0.9-1.06)	0.529	0.529	0.98 (0.89-1.08)	0.6912	0.70729
rs9329383	0.04204	19	7390741	ARHGEF18	G/A	0.03499	0.98 (0.9-1.06)	0.5901	0.5901	0.99 (0.9-1.09)	0.87	0.87
rs16993703	0.02684	20	46443629	PREX1	A/G	0.2897	0.99 (0.96-1.03)	0.7151	0.7151	1.01 (0.97-1.05)	0.6283	0.697048
rs6063248	0.03109	20	46444226	PREX1	A/G	0.2831	0.99 (0.96-1.03)	0.5959	0.5959	1.01 (0.97-1.05)	0.7024	0.710211
rs6063251	0.005978	20	46448564	PREX1	G/A	0.4477	1 (0.97-1.03)	0.9448	0.9448	1.02 (0.98-1.05)	0.3999	0.665343
rs6066724	0.03251	20	46451845	PREX1	A/G	0.2828	0.99 (0.96-1.03)	0.659	0.659	1.01 (0.97-1.05)	0.6643	0.698873
rs17347022	0.03533	20	46531162	PREX1	G/A	0.1833	0.98 (0.94-1.02)	0.2387	0.505604	0.99 (0.94-1.03)	0.5494	0.682087
rs6090877	0.03026	20	46645208	PREX1	A/G	0.2064	0.99 (0.95-1.03)	0.572	0.572	0.97 (0.93-1.02)	0.2692	0.606097
rs6095197	0.02812	20	46645848	PREX1	A/G	0.2057	0.99 (0.95-1.03)	0.5759	0.5759	0.97 (0.93-1.02)	0.2688	0.606097
rs6063285	0.02842	20	46650597	PREX1	G/A	0.0712	1.07 (1.01-1.13)	0.03314	0.253379	1.08 (1.01-1.16)	0.03362	0.338733
rs4596036	0.02293	20	46692020	PREX1	A/G	0.2618	1 (0.96-1.03)	0.9023	0.9023	0.99 (0.94-1.03)	0.4815	0.67981
rs16994003	0.01918	20	46708540	PREX1	G/A	0.193	0.98 (0.94-1.01)	0.2109	0.505604	0.95 (0.9-0.99)	0.02491	0.338733
rs2294910	0.01763	20	46709788	PREX1	G/A	0.1928	0.98 (0.94-1.02)	0.2398	0.505604	0.95 (0.91-1)	0.03118	0.338733
rs6095239	0.02125	20	46730946	PREX1	A/G	0.3081	1.01 (0.98-1.04)	0.5528	0.5528	1 (0.96-1.04)	0.9909	0.9909
rs4809716	0.004156	20	46735547	PREX1	A/G	0.1821	0.97 (0.94-1.01)	0.1699	0.502166	0.95 (0.91-1)	0.03894	0.346397
rs17436308	0.01102	20	46758867	PREX1	A/G	0.1934	0.98 (0.94-1.02)	0.2362	0.505604	0.96 (0.92-1.01)	0.07947	0.442934
rs4809720	0.006866	20	46774719	PREX1	A/G	0.06076	0.97 (0.91-1.03)	0.3065	0.505604	0.95 (0.88-1.03)	0.2339	0.606097
rs6063312	0.01118	20	46776466	PREX1	A/C	0.1429	1.01 (0.97-1.06)	0.584	0.584	1.01 (0.96-1.06)	0.7964	0.7964
rs6122718	0.004961	20	46779632	PREX1	A/G	0.2578	0.99 (0.96-1.03)	0.7288	0.7288	0.98 (0.94-1.02)	0.3165	0.624988
rs11699576	0.01405	20	46783285	PREX1	C/A	0.1438	1.02 (0.97-1.06)	0.5029	0.526123	1.01 (0.96-1.06)	0.7595	0.7595
rs4809722	0.005276	20	46787415	PREX1	A/G	0.06059	0.97 (0.91-1.03)	0.3543	0.514029	0.96 (0.89-1.04)	0.2748	0.606097
rs6066836	0.005914	20	46789890	PREX1	G/A	0.4449	0.96 (0.93-0.99)	0.01592	0.237387	0.96 (0.92-1)	0.02693	0.338733
rs3746816	0.02736	20	46794926	PREX1	G/A	0.4458	0.98 (0.95-1.01)	0.1248	0.451386	0.99 (0.95-1.02)	0.4747	0.67981
rs6019409	0.03736	20	46814397	PREX1	G/A	0.3439	0.95 (0.92-0.99)	0.00463	0.139081	0.96 (0.92-1)	0.0388	0.346397
rs2426092	0.02796	20	46817662	PREX1	C/A	0.446	0.98 (0.95-1.01)	0.1479	0.493641	0.99 (0.95-1.03)	0.5146	0.67981
rs2427416	0.03206	20	60826690	NTSR1	G/A	0.0633	0.99 (0.93-1.06)	0.7827	0.7827	0.98 (0.91-1.06)	0.5955	0.697048
rs6089930	0.01714	20	60829446	NTSR1	G/A	0.4723	1 (0.97-1.03)	0.9621	0.9621	1.01 (0.98-1.05)	0.4821	0.67981
rs6011913	0.0178	20	60829647	NTSR1	A/G	0.1557	0.99 (0.95-1.03)	0.5905	0.5905	0.99 (0.94-1.04)	0.6985	0.709219
rs2243399	0.0344	20	60853112	NTSR1	A/G	0.06692	1.04 (0.97-1.1)	0.2689	0.505604	1.05 (0.97-1.13)	0.2031	0.606097
rs7472739	0.04266	23	11543977	ARHGAP6	A/C	0.2398	0.99 (0.96-1.03)	0.5707	0.5707	0.98 (0.94-1.02)	0.3228	0.626373
rs7066678	0.03997	23	13624671	RAB9A	A/G	0.2859	0.99 (0.95-1.02)	0.4639	0.526123	0.98 (0.94-1.02)	0.4195	0.67778
rs5912686	0.01393	23	78078046	P2RY10	A/G	0.3759	0.98 (0.95-1.01)	0.2341	0.505604	0.99 (0.95-1.03)	0.6409	0.697048
rs2858575	0.03698	23	78089897	P2RY10	C/A	0.0927	1.01 (0.96-1.07)	0.6578	0.6578	1.01 (0.95-1.08)	0.7486	0.7486
rs6646569	0.03035	23	119125802	RHOXF1	A/G	0.1516	1.04 (1-1.08)	0.07244	0.362671	1.05 (0.99-1.1)	0.08135	0.443966
rs762514	0.03934	23	153328427	GDI1	G/A	0.1108	0.96 (0.91-1.01)	0.08638	0.370249	0.98 (0.93-1.04)	0.5323	0.680199
rs475025	0.01879	23	154138131	RAB39B	G/A	0.2442	0.99 (0.96-1.03)	0.7747	0.7747	1.01 (0.97-1.05)	0.6552	0.697706
