# Supplementary material for: Variants in genes encoding small GTPases and association with epithelial ovarian cancer susceptibility
Source: PLoS One. 2018 Jul 6;13(7):e0197561. doi: 10.1371/journal.pone.0197561 (PMC6034790; doi:10.1371/journal.pone.0197561)
Supplement: S2 Table — More details are available upon request. (XLSX) [file pone.0197561.s005.xlsx]

## Sheet: Sheet1
snp	chr	position	symbol	min_maj	maf	OR (95% CI)	p value	FDR_q	OR (95% CI) serous	p value serous	FDR_q serous	OR (95% CI) endometrioid	p value endometrioid	FDR_q endometrioid	OR (95% CI) clear cell	p value clear cell	OR (95% CI) mucinous	p value mucinous	OR (95% CI) borderline	p value borderline
rs221045	1	16402636	ARHGEF19	G/A	0.2604	0.98 (0.95-1.02)	0.3142	0.505604	0.98 (0.94-1.02)	0.3527	0.657313	0.96 (0.89-1.04)	0.3091	0.929637	0.96 (0.86-1.06)	0.3964	0.99 (0.89-1.1)	0.874	1.07 (0.99-1.16)	0.07525
rs2256787	1	17765403	ARHGEF10L	A/C	0.06774	1.1 (1.03-1.17)	0.00334	0.139081	1.03 (0.96-1.11)	0.435	0.67981	1.33 (1.18-1.5)	4.458e-06	0.00146771	1.08 (0.9-1.29)	0.424	1.21 (1.01-1.45)	0.03755	0.94 (0.81-1.08)	0.3628
rs10788679	1	17789549	ARHGEF10L	A/G	0.4248	1.05 (1.02-1.08)	0.001471	0.103104	1.07 (1.03-1.11)	0.0002584	0.0676902	1.06 (0.99-1.13)	0.09548	0.867374	0.98 (0.89-1.07)	0.6203	1.1 (1-1.21)	0.04357	0.95 (0.89-1.02)	0.1596
rs829374	1	21861209	RAP1GAP	G/A	0.2763	0.99 (0.96-1.02)	0.5342	0.5342	0.98 (0.94-1.02)	0.3086	0.621703	1.05 (0.97-1.13)	0.2121	0.929637	0.88 (0.8-0.98)	0.01922	1.04 (0.94-1.16)	0.4191	1.05 (0.97-1.13)	0.2267
rs12564085	1	108261079	VAV3	A/G	0.03873	1.09 (1-1.18)	0.03835	0.258965	1.03 (0.94-1.14)	0.5066	0.67981	1.08 (0.92-1.28)	0.3539	0.929637	1.26 (1.01-1.56)	0.03692	1.19 (0.94-1.5)	0.1437	0.95 (0.79-1.15)	0.6186
rs1999754	1	155208852	ARHGEF11	A/G	0.2033	1.03 (0.99-1.07)	0.0924	0.380965	1.05 (1-1.1)	0.03675	0.346397	0.99 (0.91-1.07)	0.7578	0.950722	1.04 (0.93-1.16)	0.5229	1.08 (0.96-1.21)	0.1911	0.98 (0.9-1.07)	0.7123
rs1572416	1	155218678	ARHGEF11	A/C	0.1842	0.96 (0.92-1)	0.02703	0.239799	0.96 (0.92-1.01)	0.08427	0.450516	0.97 (0.9-1.06)	0.5407	0.950722	0.93 (0.82-1.04)	0.2049	0.95 (0.84-1.07)	0.415	0.96 (0.87-1.04)	0.3118
rs7541702	1	155221057	ARHGEF11	G/A	0.1565	0.95 (0.91-0.99)	0.02651	0.239799	0.96 (0.91-1.01)	0.08639	0.452613	0.98 (0.9-1.08)	0.7217	0.950722	0.93 (0.82-1.05)	0.2401	0.94 (0.82-1.07)	0.3356	0.96 (0.87-1.05)	0.3563
rs7550260	1	155268285	ARHGEF11	A/C	0.2024	1.04 (1-1.08)	0.05517	0.313534	1.06 (1.01-1.1)	0.0221	0.338733	0.99 (0.91-1.07)	0.8067	0.950722	1.05 (0.94-1.18)	0.3593	1.07 (0.95-1.19)	0.2735	1 (0.91-1.09)	0.9223
rs17007187	1	218466531	RAB3GAP2	C/A	0.0124	0.98 (0.85-1.12)	0.7249	0.7249	1.03 (0.87-1.21)	0.7679	0.7679	0.73 (0.52-1.02)	0.06754	0.867374	1 (0.67-1.49)	0.9955	1.26 (0.86-1.84)	0.2432	1.38 (1.05-1.81)	0.02088
rs3754823	2	33592117	RASGRP3	A/G	0.3723	1.04 (1.01-1.07)	0.01611	0.237387	1.03 (0.99-1.06)	0.2047	0.606097	1.03 (0.96-1.1)	0.3801	0.935503	1.07 (0.98-1.18)	0.1382	1.1 (1-1.21)	0.05513	1.01 (0.94-1.08)	0.8868
rs6546132	2	65245546	RAB1A	G/A	0.4013	1.01 (0.98-1.04)	0.6767	0.6767	1.01 (0.97-1.05)	0.7161	0.7161	1.02 (0.95-1.09)	0.6264	0.950722	0.94 (0.86-1.03)	0.1877	1.02 (0.93-1.12)	0.6771	1.07 (1-1.15)	0.04412
rs12713665	2	68881970	ARHGAP25	C/A	0.06377	0.96 (0.9-1.02)	0.1792	0.502166	0.92 (0.85-0.99)	0.02975	0.338733	1.08 (0.95-1.23)	0.2449	0.929637	0.94 (0.78-1.13)	0.4955	1.11 (0.93-1.33)	0.2622	1.05 (0.91-1.2)	0.5237
rs1370379	2	120731059	RALB	G/A	0.3021	0.98 (0.95-1.02)	0.3179	0.505604	1 (0.96-1.04)	0.993	0.993	0.94 (0.88-1.01)	0.09297	0.867374	1.09 (0.99-1.2)	0.07568	0.9 (0.81-1)	0.04238	0.97 (0.89-1.04)	0.3604
rs2043722	2	120782781	RALB	A/G	0.1199	0.99 (0.94-1.03)	0.5528	0.5528	0.96 (0.91-1.02)	0.1669	0.606097	0.99 (0.9-1.1)	0.8814	0.950791	0.86 (0.75-1)	0.04495	1.17 (1.03-1.34)	0.01932	0.99 (0.89-1.1)	0.819
rs4849857	2	120786392	RALB	G/A	0.2781	0.98 (0.95-1.02)	0.3189	0.505604	0.99 (0.95-1.04)	0.7614	0.7614	0.93 (0.87-1.01)	0.07119	0.867374	1.09 (0.99-1.21)	0.07324	0.88 (0.79-0.98)	0.02269	0.97 (0.9-1.05)	0.4659
rs11673874	2	120787281	RALB	G/A	0.2893	0.98 (0.95-1.02)	0.3513	0.514029	0.99 (0.95-1.03)	0.752	0.752	0.94 (0.87-1.01)	0.07352	0.867374	1.12 (1.02-1.23)	0.02156	0.9 (0.81-1)	0.04011	0.96 (0.89-1.04)	0.3501
rs938817	2	144222160	ARHGAP15	G/A	0.1766	0.96 (0.92-1)	0.03923	0.258965	0.97 (0.93-1.02)	0.2327	0.606097	1 (0.92-1.09)	0.9456	0.950791	0.96 (0.85-1.08)	0.4911	0.92 (0.81-1.04)	0.1698	1.03 (0.94-1.12)	0.5766
rs3769245	2	173544447	RAPGEF4	G/A	0.06488	1.03 (0.97-1.09)	0.3889	0.514029	1.02 (0.94-1.1)	0.6807	0.70729	1.17 (1.03-1.32)	0.01597	0.867374	1.11 (0.94-1.33)	0.2265	1.1 (0.92-1.32)	0.2883	1.02 (0.89-1.17)	0.7736
rs6751505	2	173610109	RAPGEF4	A/G	0.438	1.02 (0.99-1.05)	0.2731	0.505604	1.01 (0.97-1.04)	0.8042	0.8042	1.02 (0.95-1.09)	0.5776	0.950722	0.98 (0.9-1.08)	0.7384	1.12 (1.02-1.23)	0.01984	0.94 (0.87-1.01)	0.0677
rs8682	3	20001413	RAB5A	C/G	0.1482	0.99 (0.95-1.03)	0.5893	0.5893	1.02 (0.97-1.07)	0.446	0.67981	0.98 (0.89-1.07)	0.5953	0.950722	1.08 (0.96-1.22)	0.2209	0.93 (0.82-1.07)	0.3182	0.9 (0.81-0.99)	0.0368
rs12496392	3	20002841	RAB5A	C/A	0.1483	0.99 (0.95-1.03)	0.5537	0.5537	1.02 (0.97-1.07)	0.4495	0.67981	0.97 (0.89-1.07)	0.573	0.950722	1.08 (0.95-1.22)	0.2293	0.93 (0.81-1.06)	0.2842	0.9 (0.81-0.99)	0.03857
rs13072891	3	20003574	RAB5A	G/A	0.3796	1.01 (0.98-1.05)	0.3687	0.514029	1.04 (1-1.08)	0.04806	0.359707	1 (0.93-1.07)	0.9559	0.9559	1.02 (0.93-1.12)	0.6908	0.95 (0.86-1.04)	0.2564	0.98 (0.91-1.05)	0.5802
rs17057445	3	56924856	ARHGEF3	G/A	0.1482	1.03 (0.99-1.08)	0.1573	0.501151	1.08 (1.03-1.14)	0.001909	0.12502	0.96 (0.88-1.05)	0.381	0.935503	0.93 (0.82-1.06)	0.2755	0.94 (0.82-1.07)	0.3414	0.99 (0.9-1.1)	0.8996
rs6785206	3	129894714	RAB7A	A/G	0.08975	0.97 (0.92-1.02)	0.2051	0.505604	0.96 (0.9-1.02)	0.1615	0.606097	1.02 (0.91-1.14)	0.7063	0.950722	1.07 (0.92-1.25)	0.3708	0.79 (0.66-0.94)	0.009661	0.95 (0.84-1.07)	0.416
rs6800715	3	154418657	RAP2B	G/A	0.1923	0.96 (0.92-0.99)	0.02432	0.239799	0.95 (0.9-0.99)	0.02381	0.338733	0.99 (0.91-1.08)	0.8501	0.950722	0.99 (0.88-1.11)	0.8839	0.97 (0.86-1.09)	0.5584	0.98 (0.9-1.07)	0.6545
rs6444967	3	172357092	TNIK	C/A	0.2028	0.99 (0.96-1.03)	0.6756	0.6756	0.97 (0.93-1.02)	0.2468	0.606097	1.02 (0.94-1.1)	0.6959	0.950722	1.12 (1-1.24)	0.04144	0.93 (0.83-1.04)	0.2164	0.98 (0.9-1.07)	0.6414
rs11717665	3	172490610	TNIK	A/G	0.0272	0.87 (0.79-0.96)	0.00455	0.139081	0.89 (0.8-1)	0.0455	0.350563	1.03 (0.85-1.24)	0.7872	0.950722	0.79 (0.59-1.07)	0.1262	0.79 (0.58-1.09)	0.1562	0.97 (0.78-1.19)	0.7494
rs6780532	3	172554921	TNIK	A/C	0.3308	0.99 (0.96-1.02)	0.4622	0.526123	1.02 (0.98-1.06)	0.3743	0.657674	0.93 (0.87-1)	0.05224	0.867374	0.88 (0.8-0.97)	0.007787	0.98 (0.89-1.08)	0.6695	0.98 (0.91-1.05)	0.5134
rs26286	5	14219402	TRIO	A/C	0.4687	1.01 (0.98-1.04)	0.558	0.558	1.02 (0.98-1.05)	0.4372	0.67981	1.07 (1.01-1.15)	0.02982	0.867374	0.98 (0.89-1.07)	0.6296	0.95 (0.86-1.04)	0.2511	0.99 (0.93-1.07)	0.8657
rs17302526	5	14339802	TRIO	A/G	0.04613	0.97 (0.9-1.04)	0.393	0.514029	0.95 (0.87-1.04)	0.2571	0.606097	1.1 (0.95-1.28)	0.1934	0.922801	0.96 (0.78-1.19)	0.735	1.02 (0.82-1.26)	0.8713	1.17 (1-1.36)	0.04619
rs773765	5	14344614	TRIO	G/A	0.04565	0.95 (0.88-1.02)	0.1683	0.502166	0.99 (0.91-1.08)	0.8082	0.8082	0.9 (0.77-1.06)	0.2121	0.929637	0.99 (0.79-1.22)	0.8966	0.86 (0.68-1.08)	0.1987	1.2 (1.03-1.4)	0.01859
rs153227	5	80404068	RASGRF2	G/A	0.2294	1.04 (1-1.07)	0.06078	0.336326	1.06 (1.02-1.11)	0.006245	0.204492	0.99 (0.91-1.07)	0.7315	0.950722	1.05 (0.94-1.17)	0.3901	0.94 (0.84-1.05)	0.2586	1.09 (1-1.18)	0.04535
rs153226	5	80406671	RASGRF2	G/A	0.3873	1.03 (1-1.06)	0.08804	0.370249	1.04 (1.01-1.08)	0.02423	0.338733	1.01 (0.95-1.08)	0.6891	0.950722	1.03 (0.94-1.13)	0.476	0.95 (0.86-1.05)	0.3109	1.07 (0.99-1.14)	0.07706
rs26418	5	80414865	RASGRF2	A/G	0.2163	1.02 (0.98-1.06)	0.2542	0.505604	1.05 (1-1.09)	0.04535	0.350563	0.99 (0.92-1.07)	0.8245	0.950722	1 (0.9-1.12)	0.9575	0.94 (0.84-1.06)	0.2986	1.05 (0.97-1.15)	0.2128
rs540564	5	80439148	RASGRF2	A/G	0.3815	0.97 (0.94-1)	0.04808	0.289696	0.96 (0.92-1)	0.02675	0.338733	0.95 (0.89-1.01)	0.1138	0.867374	1 (0.92-1.1)	0.9444	0.98 (0.89-1.08)	0.702	0.97 (0.91-1.04)	0.4302
rs248989	5	80472340	RASGRF2	G/A	0.4596	1.02 (0.99-1.05)	0.3193	0.505604	1.03 (0.99-1.06)	0.1806	0.606097	1.07 (1-1.14)	0.04396	0.867374	0.94 (0.86-1.02)	0.1482	1 (0.91-1.1)	0.9882	1.06 (0.99-1.14)	0.1046
rs34117	5	80477537	RASGRF2	A/G	0.413	1.02 (0.99-1.05)	0.3169	0.505604	1.05 (1.01-1.09)	0.01205	0.315661	1.04 (0.97-1.11)	0.2744	0.929637	0.91 (0.83-1)	0.0437	0.94 (0.85-1.03)	0.1806	1.07 (1-1.15)	0.04781
rs12516352	5	173937149	MSX2	G/A	0.03303	0.9 (0.82-0.98)	0.01268	0.237387	0.84 (0.76-0.94)	0.001361	0.118842	0.89 (0.74-1.07)	0.232	0.929637	0.99 (0.77-1.26)	0.9138	0.96 (0.74-1.24)	0.7365	0.84 (0.68-1.03)	0.08574
rs11746728	5	173983412	MSX2	G/A	0.3493	0.96 (0.93-0.99)	0.01228	0.237387	0.97 (0.93-1.01)	0.09407	0.464953	0.98 (0.92-1.05)	0.6175	0.950722	0.91 (0.83-1)	0.06101	0.9 (0.81-0.99)	0.03542	0.94 (0.87-1.01)	0.08333
rs3940643	5	179517915	RASGEF1C	A/G	0.282	0.97 (0.94-1.01)	0.09584	0.386784	0.98 (0.94-1.02)	0.2664	0.606097	0.98 (0.91-1.05)	0.5535	0.950722	0.9 (0.82-1)	0.04513	0.94 (0.85-1.05)	0.2789	1.02 (0.94-1.1)	0.6656
rs7720463	5	179519062	RASGEF1C	A/G	0.2217	0.96 (0.92-0.99)	0.02145	0.237387	0.95 (0.91-1)	0.03335	0.338733	1.01 (0.93-1.09)	0.855	0.950722	0.92 (0.82-1.02)	0.1269	0.88 (0.79-0.99)	0.03765	0.99 (0.91-1.07)	0.7794
rs11749727	5	179540966	RASGEF1C	G/A	0.3777	0.96 (0.93-0.99)	0.01809	0.237387	0.95 (0.91-0.98)	0.003582	0.15639	1.01 (0.94-1.08)	0.8164	0.950722	0.98 (0.89-1.07)	0.611	0.97 (0.88-1.07)	0.537	0.96 (0.89-1.03)	0.2629
rs12203956	6	129906258	ARHGAP18	G/A	0.07258	0.93 (0.87-0.98)	0.01081	0.237387	0.91 (0.85-0.98)	0.01404	0.334355	0.9 (0.79-1.02)	0.1007	0.867374	0.98 (0.82-1.16)	0.7937	0.84 (0.69-1.01)	0.06734	0.92 (0.81-1.05)	0.2304
rs1190788	6	131562348	AKAP7	A/G	0.3582	1.03 (1-1.07)	0.03941	0.258965	1.02 (0.98-1.06)	0.2551	0.606097	0.98 (0.92-1.05)	0.5854	0.950722	1.03 (0.94-1.13)	0.546	1.08 (0.98-1.19)	0.1214	1.03 (0.96-1.11)	0.3753
rs1190806	6	131567377	AKAP7	G/A	0.3588	1.03 (1-1.07)	0.04822	0.289696	1.02 (0.98-1.06)	0.2869	0.606097	0.98 (0.91-1.05)	0.5259	0.950722	1.03 (0.94-1.13)	0.5666	1.08 (0.98-1.18)	0.1369	1.03 (0.96-1.1)	0.4528
rs7807765	7	91369910	AKAP9	A/C	0.4998	0.99 (0.97-1.03)	0.7344	0.7344	0.99 (0.95-1.03)	0.5467	0.682087	1.01 (0.94-1.07)	0.8301	0.950722	1.08 (0.99-1.18)	0.09497	0.89 (0.81-0.98)	0.01303	1.01 (0.94-1.08)	0.8359
rs221305	7	157064274	PTPRN2	G/A	0.1711	1.03 (0.98-1.07)	0.2346	0.505604	0.99 (0.95-1.05)	0.8294	0.8294	1.06 (0.98-1.16)	0.1618	0.905646	0.92 (0.82-1.04)	0.1956	1.1 (0.97-1.24)	0.1315	1.04 (0.95-1.13)	0.4458
rs4716760	7	157069405	PTPRN2	A/G	0.1715	1.03 (0.99-1.07)	0.1729	0.502166	1 (0.95-1.05)	0.9433	0.9433	1.07 (0.98-1.16)	0.1449	0.867374	0.92 (0.82-1.04)	0.1941	1.1 (0.97-1.24)	0.1412	1.02 (0.93-1.12)	0.644
rs10274279	7	157080202	PTPRN2	G/A	0.132	1.02 (0.98-1.07)	0.3307	0.510404	0.98 (0.93-1.04)	0.5366	0.682087	1.08 (0.98-1.19)	0.1104	0.867374	0.92 (0.8-1.05)	0.2211	1.18 (1.04-1.35)	0.0132	1.02 (0.92-1.13)	0.7339
rs10949655	7	157085824	PTPRN2	A/C	0.1552	1.02 (0.98-1.07)	0.306	0.505604	0.99 (0.94-1.05)	0.7813	0.7813	1.1 (1-1.2)	0.03997	0.867374	0.91 (0.8-1.03)	0.1284	1.06 (0.93-1.21)	0.3568	1.02 (0.93-1.13)	0.6297
rs1268391	7	157111665	PTPRN2	G/A	0.3228	0.97 (0.94-1)	0.04694	0.289696	0.96 (0.92-1)	0.0283	0.338733	1.01 (0.94-1.08)	0.7384	0.950722	0.97 (0.88-1.06)	0.4899	0.96 (0.87-1.06)	0.4016	1.06 (0.98-1.14)	0.1238
rs1263542	7	157113869	PTPRN2	G/A	0.2646	0.97 (0.93-1)	0.05165	0.301684	0.95 (0.91-0.99)	0.01976	0.338733	1.01 (0.94-1.09)	0.7096	0.950722	1.02 (0.92-1.12)	0.7756	0.94 (0.84-1.04)	0.2236	1.04 (0.96-1.13)	0.3137
rs7777968	7	157773101	PTPRN2	G/A	0.2519	1 (0.96-1.03)	0.8654	0.8654	0.99 (0.95-1.03)	0.5959	0.697048	1.02 (0.95-1.1)	0.5471	0.950722	0.92 (0.83-1.02)	0.1162	1.14 (1.03-1.27)	0.01143	0.98 (0.91-1.06)	0.6259
rs4909062	7	157796605	PTPRN2	G/A	0.4987	1.01 (0.98-1.04)	0.6815	0.6815	1 (0.96-1.04)	0.9993	0.9993	1 (0.93-1.06)	0.9333	0.950791	1.11 (1.01-1.21)	0.02801	0.94 (0.85-1.03)	0.1668	1.03 (0.96-1.1)	0.4565
rs11139810	9	84632239	RASEF	G/A	0.08683	1.05 (1-1.11)	0.07035	0.360798	1.08 (1.01-1.15)	0.02338	0.338733	1.02 (0.91-1.14)	0.7482	0.950722	1.02 (0.87-1.19)	0.8372	1.04 (0.88-1.23)	0.6341	1.05 (0.93-1.19)	0.4017
rs10987574	9	129007959	RALGPS1	A/G	0.207	1.01 (0.97-1.05)	0.5639	0.5639	1.03 (0.99-1.08)	0.1428	0.566784	0.9 (0.83-0.98)	0.01496	0.867374	1.02 (0.91-1.14)	0.7215	0.99 (0.88-1.11)	0.7999	0.98 (0.9-1.07)	0.7191
rs2779710	9	129015426	RALGPS1	A/G	0.4728	1 (0.97-1.03)	0.7987	0.7987	1 (0.96-1.04)	0.9499	0.9499	1.03 (0.96-1.1)	0.4166	0.950722	1 (0.92-1.1)	0.9621	0.91 (0.83-1)	0.04934	1.02 (0.95-1.1)	0.5154
rs2689694	10	95927934	PLCE1	A/G	0.392	0.98 (0.95-1.01)	0.2601	0.505604	0.98 (0.94-1.02)	0.3014	0.615299	1.01 (0.94-1.08)	0.798	0.950722	0.9 (0.83-0.99)	0.03249	0.98 (0.89-1.08)	0.7068	0.94 (0.87-1.01)	0.07343
rs12248509	10	95987180	PLCE1	A/G	0.05209	0.92 (0.86-0.99)	0.02036	0.237387	0.91 (0.84-0.99)	0.03109	0.338733	0.87 (0.75-1.02)	0.08046	0.867374	0.86 (0.7-1.07)	0.176	0.87 (0.7-1.08)	0.2046	1.01 (0.87-1.18)	0.8837
rs2253104	11	6456885	ARFIP2	A/G	0.4632	0.97 (0.94-1)	0.07609	0.363399	0.98 (0.94-1.01)	0.1837	0.606097	1 (0.93-1.06)	0.9088	0.950791	0.91 (0.84-1)	0.04945	0.92 (0.84-1.01)	0.09688	0.99 (0.93-1.07)	0.8842
rs1481871	11	13147869	RASSF10	C/A	0.4131	1.03 (1-1.07)	0.03374	0.253379	1.03 (0.99-1.07)	0.1738	0.606097	1.08 (1.01-1.15)	0.02377	0.867374	1.07 (0.98-1.17)	0.1446	0.99 (0.9-1.09)	0.8897	1.03 (0.96-1.1)	0.4537
rs748923	11	13162736	RASSF10	A/C	0.09715	1.06 (1.01-1.11)	0.02915	0.245179	1.04 (0.98-1.11)	0.1792	0.606097	1.14 (1.03-1.27)	0.01386	0.867374	1.03 (0.89-1.2)	0.6886	1.04 (0.89-1.21)	0.6487	0.96 (0.85-1.08)	0.4663
rs12421920	11	13206335	RASSF10	G/A	0.08917	1.06 (1.01-1.12)	0.02624	0.239799	1.06 (0.99-1.13)	0.09596	0.465511	1.12 (1.01-1.25)	0.04099	0.867374	1.09 (0.93-1.26)	0.294	1.1 (0.94-1.29)	0.2497	1.07 (0.95-1.2)	0.2701
rs2270134	12	4629049	AKAP3	A/G	0.4546	0.96 (0.94-0.99)	0.02068	0.237387	0.97 (0.94-1.01)	0.1083	0.50661	0.96 (0.9-1.02)	0.1733	0.905646	1.04 (0.95-1.14)	0.4122	0.87 (0.8-0.96)	0.004862	0.96 (0.9-1.03)	0.3068
rs4528424	12	25319229	KRAS	G/A	0.4071	0.97 (0.94-1)	0.07777	0.363399	0.95 (0.91-0.98)	0.004805	0.179816	0.99 (0.93-1.06)	0.7712	0.950722	0.98 (0.9-1.08)	0.6801	1.04 (0.94-1.14)	0.4809	1.01 (0.94-1.08)	0.7679
rs4963872	12	25375524	KRAS	A/G	0.06351	1.05 (0.99-1.12)	0.1236	0.451386	1.03 (0.95-1.1)	0.5203	0.67981	0.98 (0.85-1.12)	0.7288	0.950722	1.04 (0.86-1.24)	0.7061	1.35 (1.14-1.6)	0.0004469	1.05 (0.91-1.2)	0.5203
rs11175655	12	38909994	LRRK2	A/G	0.1175	0.97 (0.93-1.02)	0.2554	0.505604	0.98 (0.92-1.03)	0.4013	0.665343	0.97 (0.88-1.08)	0.6167	0.950722	0.95 (0.82-1.09)	0.4403	0.94 (0.81-1.09)	0.4419	1.08 (0.98-1.2)	0.1392
rs10784498	12	38983701	LRRK2	A/G	0.3459	0.99 (0.95-1.02)	0.3634	0.514029	0.98 (0.95-1.02)	0.4228	0.67778	1.02 (0.95-1.09)	0.5894	0.950722	0.89 (0.81-0.98)	0.02007	1.07 (0.97-1.18)	0.1658	1.08 (1.01-1.16)	0.03066
rs11176052	12	39010167	LRRK2	A/G	0.2439	0.98 (0.94-1.01)	0.2017	0.505604	0.98 (0.94-1.03)	0.4156	0.67778	1.02 (0.94-1.09)	0.6997	0.950722	0.88 (0.79-0.98)	0.01584	1.01 (0.9-1.12)	0.9149	1.02 (0.94-1.1)	0.6768
rs11176053	12	39010297	LRRK2	A/G	0.2439	0.98 (0.94-1.01)	0.2055	0.505604	0.98 (0.94-1.03)	0.4295	0.67778	1.02 (0.94-1.09)	0.6966	0.950722	0.87 (0.78-0.97)	0.01391	1.01 (0.9-1.12)	0.9101	1.02 (0.94-1.1)	0.672
rs2404835	12	39016730	LRRK2	A/G	0.3317	1.03 (0.99-1.06)	0.1288	0.451386	1.01 (0.97-1.05)	0.5023	0.67981	1.06 (0.99-1.13)	0.1073	0.867374	1 (0.91-1.1)	0.9782	1.09 (0.99-1.21)	0.0692	1.06 (0.98-1.14)	0.1453
rs3213122	12	54649933	RAB5B	A/C	0.07867	1.02 (0.96-1.08)	0.5793	0.5793	1.02 (0.95-1.09)	0.6532	0.697706	0.94 (0.83-1.06)	0.307	0.929637	1.1 (0.94-1.29)	0.2403	1.05 (0.89-1.25)	0.5645	1.17 (1.03-1.32)	0.01281
rs8014419	14	31967501	AKAP6	G/A	0.04635	1.02 (0.95-1.1)	0.5652	0.5652	0.98 (0.89-1.07)	0.5845	0.697048	1.18 (1.02-1.36)	0.02806	0.867374	0.97 (0.78-1.21)	0.7947	1.03 (0.83-1.29)	0.7851	1.04 (0.88-1.22)	0.6599
rs927062	14	32164800	AKAP6	G/A	0.2099	0.94 (0.9-0.97)	0.0005859	0.0615995	0.93 (0.89-0.98)	0.002479	0.129879	0.96 (0.88-1.04)	0.2799	0.929637	0.87 (0.78-0.97)	0.0161	0.98 (0.88-1.1)	0.7779	1.07 (0.98-1.16)	0.1167
rs1955513	14	32245693	AKAP6	C/A	0.07198	0.9 (0.85-0.95)	0.0003285	0.0615995	0.89 (0.83-0.95)	0.001018	0.118842	0.91 (0.8-1.03)	0.1359	0.867374	0.9 (0.75-1.07)	0.2373	0.95 (0.8-1.14)	0.5913	0.96 (0.84-1.1)	0.5569
rs2467307	17	5109042	RABEP1	A/G	0.03226	1.05 (0.96-1.15)	0.2555	0.505604	1.05 (0.95-1.16)	0.3681	0.657674	1.07 (0.9-1.29)	0.4368	0.950722	1.14 (0.9-1.45)	0.2794	1.03 (0.79-1.34)	0.8397	0.85 (0.69-1.05)	0.1277
rs178853	17	26791321	RAB11FIP4	A/G	0.4938	0.96 (0.94-0.99)	0.01864	0.237387	0.96 (0.93-1)	0.04352	0.350563	0.95 (0.89-1.02)	0.1548	0.894122	0.94 (0.86-1.03)	0.1803	0.97 (0.89-1.07)	0.5901	0.95 (0.89-1.02)	0.1689
rs178858	17	26797877	RAB11FIP4	A/G	0.3579	1.05 (1.02-1.08)	0.003882	0.139081	1.04 (1-1.08)	0.0658	0.412586	1.08 (1.01-1.15)	0.0259	0.867374	1.11 (1.01-1.21)	0.03215	1 (0.91-1.11)	0.9421	1.05 (0.98-1.13)	0.1515
rs178870	17	26807370	RAB11FIP4	A/G	0.4495	0.96 (0.93-0.99)	0.01688	0.237387	0.96 (0.93-1)	0.04273	0.350563	0.95 (0.89-1.02)	0.1438	0.867374	0.97 (0.88-1.06)	0.4485	0.98 (0.89-1.07)	0.6183	0.96 (0.9-1.03)	0.2889
rs178873	17	26808557	RAB11FIP4	A/G	0.4909	1.04 (1-1.07)	0.02737	0.239799	1.04 (1-1.08)	0.03967	0.346397	1.03 (0.97-1.1)	0.3182	0.929637	1.05 (0.96-1.15)	0.2651	1.03 (0.94-1.14)	0.4795	1.05 (0.98-1.13)	0.1308
rs178900	17	26824782	RAB11FIP4	G/A	0.2497	1.02 (0.98-1.06)	0.3077	0.505604	1.01 (0.97-1.05)	0.6444	0.697048	0.98 (0.91-1.06)	0.6623	0.950722	1.11 (1-1.23)	0.04383	1.07 (0.96-1.19)	0.2306	0.96 (0.89-1.04)	0.3538
rs7228240	18	9719894	RAB31	G/A	0.2121	1.03 (0.99-1.07)	0.1775	0.502166	1.05 (1.01-1.1)	0.02765	0.338733	0.99 (0.91-1.07)	0.7546	0.950722	1.01 (0.9-1.12)	0.9207	1.05 (0.93-1.17)	0.427	1.01 (0.93-1.1)	0.8098
rs11873271	18	9726809	RAB31	A/G	0.1687	0.98 (0.95-1.03)	0.445	0.526123	1.02 (0.97-1.07)	0.5469	0.682087	0.91 (0.83-0.99)	0.03303	0.867374	0.96 (0.85-1.09)	0.5567	1.02 (0.9-1.16)	0.7375	0.97 (0.89-1.07)	0.5496
rs11663730	18	9755845	RAB31	G/A	0.03902	1.04 (0.96-1.12)	0.3561	0.514029	0.98 (0.89-1.08)	0.6757	0.705202	1.25 (1.07-1.46)	0.004224	0.695336	0.99 (0.79-1.26)	0.956	0.98 (0.77-1.24)	0.8465	1 (0.84-1.2)	0.9615
rs17202361	18	16872068	ROCK1	G/A	0.0419	1.09 (1.01-1.17)	0.03236	0.253379	1.05 (0.96-1.15)	0.303	0.615299	1.04 (0.89-1.23)	0.6028	0.950722	1.11 (0.9-1.37)	0.3389	1.07 (0.85-1.35)	0.5738	1.01 (0.85-1.2)	0.9414
rs1006881	18	16935291	ROCK1	A/G	0.04254	1.08 (1.01-1.17)	0.03607	0.258965	1.06 (0.96-1.16)	0.2372	0.606097	1.02 (0.87-1.2)	0.809	0.950722	1.11 (0.9-1.37)	0.3241	1.04 (0.82-1.32)	0.7419	1.02 (0.86-1.21)	0.7833
rs6090877	20	46645208	PREX1	A/G	0.2064	0.99 (0.95-1.03)	0.572	0.572	0.97 (0.93-1.02)	0.2692	0.606097	1 (0.92-1.08)	0.9836	0.9836	0.92 (0.82-1.03)	0.1552	1.06 (0.95-1.19)	0.3044	0.91 (0.83-0.99)	0.03171
rs6095197	20	46645848	PREX1	A/G	0.2057	0.99 (0.95-1.03)	0.5759	0.5759	0.97 (0.93-1.02)	0.2688	0.606097	1.01 (0.93-1.09)	0.8692	0.950722	0.92 (0.82-1.03)	0.1389	1.06 (0.95-1.19)	0.3057	0.91 (0.84-1)	0.04561
rs6063285	20	46650597	PREX1	G/A	0.0712	1.07 (1.01-1.13)	0.03314	0.253379	1.08 (1.01-1.16)	0.03362	0.338733	1.04 (0.92-1.18)	0.5665	0.950722	1.08 (0.91-1.28)	0.4058	0.98 (0.81-1.18)	0.8351	1.05 (0.92-1.2)	0.4726
rs16994003	20	46708540	PREX1	G/A	0.193	0.98 (0.94-1.01)	0.2109	0.505604	0.95 (0.9-0.99)	0.02491	0.338733	0.99 (0.91-1.08)	0.8491	0.950722	0.94 (0.84-1.05)	0.2832	1.02 (0.9-1.15)	0.7734	0.89 (0.81-0.97)	0.01078
rs2294910	20	46709788	PREX1	G/A	0.1928	0.98 (0.94-1.02)	0.2398	0.505604	0.95 (0.91-1)	0.03118	0.338733	1 (0.92-1.08)	0.9183	0.950791	0.94 (0.83-1.05)	0.2617	1.02 (0.91-1.15)	0.7487	0.89 (0.82-0.98)	0.01297
rs4809716	20	46735547	PREX1	A/G	0.1821	0.97 (0.94-1.01)	0.1699	0.502166	0.95 (0.91-1)	0.03894	0.346397	0.99 (0.91-1.08)	0.8362	0.950722	0.91 (0.81-1.02)	0.1056	0.98 (0.86-1.1)	0.6968	0.88 (0.8-0.96)	0.006394
rs17436308	20	46758867	PREX1	A/G	0.1934	0.98 (0.94-1.02)	0.2362	0.505604	0.96 (0.92-1.01)	0.07947	0.442934	1.01 (0.93-1.09)	0.9041	0.950791	0.91 (0.81-1.02)	0.1064	0.98 (0.87-1.11)	0.7917	0.89 (0.82-0.98)	0.01472
rs6122718	20	46779632	PREX1	A/G	0.2578	0.99 (0.96-1.03)	0.7288	0.7288	0.98 (0.94-1.02)	0.3165	0.624988	1.01 (0.94-1.09)	0.7871	0.950722	0.95 (0.85-1.05)	0.2933	1.01 (0.91-1.13)	0.8212	0.92 (0.85-0.99)	0.03582
rs6066836	20	46789890	PREX1	G/A	0.4449	0.96 (0.93-0.99)	0.01592	0.237387	0.96 (0.92-1)	0.02693	0.338733	0.97 (0.91-1.03)	0.3406	0.929637	0.93 (0.85-1.01)	0.09886	0.94 (0.85-1.03)	0.1684	0.94 (0.88-1.01)	0.0917
rs6019409	20	46814397	PREX1	G/A	0.3439	0.95 (0.92-0.99)	0.00463	0.139081	0.96 (0.92-1)	0.0388	0.346397	0.95 (0.89-1.02)	0.1377	0.867374	0.93 (0.85-1.02)	0.131	0.9 (0.81-0.99)	0.02962	0.92 (0.85-0.99)	0.02484
rs6089930	20	60829446	NTSR1	G/A	0.4723	1 (0.97-1.03)	0.9621	0.9621	1.01 (0.98-1.05)	0.4821	0.67981	1.04 (0.97-1.11)	0.2706	0.929637	0.9 (0.83-0.99)	0.02683	1 (0.91-1.1)	0.9525	0.99 (0.92-1.06)	0.7581
rs475025	23	154138131	RAB39B	G/A	0.2442	0.99 (0.96-1.03)	0.7747	0.7747	1.01 (0.97-1.05)	0.6552	0.697706	1.01 (0.93-1.09)	0.8517	0.950722	0.92 (0.83-1.02)	0.1284	0.9 (0.81-1.01)	0.06566	0.97 (0.9-1.06)	0.5168
